37 #These authors equally contributed to this work

38



39 **Abstract**

40

41 Methamphetamine (Meth) is a powerful illicit psychostimulant, widely used for recreational  
42 purposes. Besides disrupting the monoaminergic system and promoting oxidative brain  
43 damage, Meth also causes neuroinflammation that contributes to synaptic dysfunction and  
44 behavioral deficits. Aberrant activation of microglia, the largest myeloid cell population in the  
45 brain, is a common feature in neurological disorders linked to cognitive impairment and  
46 neuroinflammation. In this study, we investigated the mechanisms underlying the aberrant  
47 activation of microglia elicited by Meth in the adult mouse brain. We found that binge Meth  
48 exposure caused microgliosis and disrupted risk assessment behavior (a feature that usually  
49 occurs in human Meth abusers), both of which required astrocyte-to-microglia crosstalk.  
50 Mechanistically, Meth triggered a detrimental increase of glutamate exocytosis from  
51 astrocytes (in a manner dependent on TNF production and calcium mobilization), promoting  
52 microglial expansion and reactivity. Ablating TNF production or suppressing astrocytic calcium  
53 mobilization prevented microglia reactivity and abolished the behavioral phenotype elicited by  
54 Meth exposure. Overall, our data indicate that glial crosstalk is critical to relay behavioral  
55 alterations caused by acute Meth exposure.

## 56 Introduction

57

58 Methamphetamine (Meth) is a potent and highly-addictive psychostimulant that causes  
59 long-lasting harmful effects in the central nervous system (CNS)<sup>1,2</sup>. Meth toxicity is classically  
60 characterized by severe disruption of the dopaminergic system, causing oxidative stress and  
61 behavioral deficits<sup>3,4</sup>. More recently, release of proinflammatory mediators and glutamate were  
62 also reported<sup>5,6</sup>.

63 There is a growing understanding that the interplay between neuronal and glial cells is  
64 important for the build-up and maintenance of addiction<sup>7-9</sup>. Gliotransmission is implicated in  
65 drug-seeking modulation, with particular focus on glutamatergic signaling<sup>10,11</sup>, that can trigger  
66 calcium influx, leading to reactive oxygen species (ROS) formation and subsequent oxidative  
67 damage<sup>12</sup>. However, the overall contribution of such mechanisms to the addictive process  
68 remains unclear<sup>13,14</sup>.

69 Microglia and astrocytes play crucial roles in brain injury and repair<sup>15,16</sup>, but their  
70 sustained reactivity – often increasing the production of proinflammatory mediators like TNF,  
71 glutamate, and ROS<sup>17,18</sup> – may result in damage to the brain parenchyma<sup>19,20</sup>. Under exposure  
72 to psychoactive substances, microglia may also become highly reactive, augmenting the  
73 release of proinflammatory mediators<sup>13</sup>, and in early abstinence this reactivity might increase  
74 the likelihood of relapse<sup>9,13</sup>. Therefore, a better understanding of the microglia reactivity and  
75 associated brain immune-pathways in response to psychostimulants is paramount to  
76 implement relevant interventions for treating addictive behaviors. In accordance, we have  
77 recently demonstrated that binge alcohol administration to adult mice causes aberrant  
78 synaptic pruning and loss of prefrontal cortex excitatory synapses, increasing anxiety-like  
79 behavior, which is prevented by pharmacological blockade of Src activation or by reducing  
80 TNF production in microglia<sup>21</sup>.

81 Here, we investigated how Meth interferes with microglia reactivity. Our results showed  
82 that the behavioral alterations caused by binge Meth exposure are mediated by astrocyte-  
83 microglia crosstalk in which release of glutamate from astrocytes in a TNF/IP<sub>3</sub> receptor  
84 (IP<sub>3</sub>R)/SNARE-dependent manner leads to microglial activation, neuroinflammation, and  
85 ultimately to changes in behavior.

## 86 **Materials and Methods**

87

### 88 **Animals**

89 All experiments were in accordance with the Directive 2010/63/EU and approved by  
90 the competent authorities Direcção Geral de Alimentação e Veterinária (DGAV) and i3S  
91 Animal Ethical Committee (ref.2018-13-TS and DGAV 17469/2012). Researchers involved in  
92 animal experimentation were FELASA certified. All efforts were made to minimize animal  
93 suffering and the number of animals used.

94 Mice were housed under specific pathogen-free conditions, controlled environment  
95 (20°C, 45–55% humidity) with an inverted 12h/12h light/dark cycle, and allowed free access  
96 to food and water. Because of the potential behavioral variability related to the estrous cycle  
97 in females<sup>22</sup>, only male mice were used. C57BL/6 male mice were obtained from the i3S  
98 animal facility. TNF knockout mice in the C57BL/6 background (referred herein as TNF KO)  
99 were kindly supplied by Professor Rui Appelberg (University of Porto). TNF KO mice<sup>21</sup> were  
100 maintained at i3S and genotyped by PCR using ATCCGCGACGTGGAAGTGGCAGAA  
101 (forward) and CTGCCCGGACTCCGCAAAGTCTAA (reverse) primer pair. IP3R2 KO mice<sup>23,24</sup>  
102 were held at ICVS animal facility and genotyped PCR using the primer pairs: WT (F, 5'-  
103 ACCCTGATGAGGGAAGGTCT-3'; R, 5'-ATCGATTCATAGGGCACACC-3') and mutant  
104 allele (neo-specific primer: F, 5'-AATGGGCTGACCGCTTCCTCGT-3'; R, 5'-  
105 TCTGAGAGTGCCTGGCTTTT-3').

106

### 107 **Mice treatment**

108 Mice were treated using a Meth binge protocol<sup>25,26</sup> and randomly assigned to treated  
109 group (4x5mg/kg Meth, 2h apart, intraperitoneally) or control (4x isovolumetric saline), and  
110 sacrificed 24h after the first administration (**Suppl.Fig. 1A**). Since Meth causes  
111 hyperthermia<sup>27</sup>, we controlled body temperature through infrared readings every 20min using  
112 subcutaneous tags (Biomark, ID, USA). Meth significantly increased body temperature  
113 (**Suppl. Fig. 1B**) but did not exceed critical values. Methamphetamine hydrochloride was  
114 imported from Sigma-Aldrich (MO, USA) under special INFARMED license (ref. 290-13).

115

### 116 **Fluorescence-Activated Cell Sorting (FACS) and RNA extraction**

117 Twenty-four hours after methamphetamine administration, animals were perfused  
118 under deep anesthesia with ice-cold PBS. The brains were removed and collected in ice-cold  
119 medium A (HBBS 1X (Thermo Scientific MA, USA) supplemented with 15mM HEPES and  
120 0.6% glucose both from Sigma-Aldrich (MO, USA). Microglial cells were isolated from adult  
121 mice brain exactly as previously described<sup>28</sup>. Microglia (Cd11b<sup>+</sup>, CD45<sup>low</sup> and CD206<sup>-</sup>) were  
122 sorted on the FACS ARIA (BD Immunocytometry Systems, CA, USA) and the RNA was

123 isolated using a RNeasy Plus Micro Kit (Qiagen, Düsseldorf, DE) according to the  
124 manufacturer's instructions. RNA integrity was analyzed using the Bioanalyzer 2100 RNA Pico  
125 chips (Agilent Technologies, CA, USA), according to manufacturer instructions.

126

## 127 **Library preparation and Sequencing**

128 Ion Torrent sequencing libraries were prepared according to the AmpliSeq Library prep  
129 kit protocol. Briefly, 1ng of highly intact total RNA was reverse transcribed, the resulting cDNA  
130 was amplified for 16 cycles by adding PCR Master Mix, and the AmpliSeq mouse  
131 transcriptome gene expression primer pool. Amplicons were digested with the proprietary  
132 FuPa enzyme, then barcoded adapters were ligated onto the target amplicons. The library  
133 amplicons were bound to magnetic beads, and residual reaction components were washed  
134 off. Libraries were amplified, re-purified and individually quantified using Agilent TapeStation  
135 High Sensitivity tape. Individual libraries were diluted to a 50pM concentration and pooled  
136 equally. Emulsion PCR, templating and 550 chip loading was performed with an Ion Chef  
137 Instrument (Thermo Scientific MA, USA). Sequencing was performed on an Ion S5XL™  
138 sequencer (Thermo Scientific MA, USA).

139

## 140 **Bioinformatics**

141 Data from the S5 XL run processed using the Ion Torrent platform specific pipeline  
142 software Torrent Suite v5.12 to generate sequence reads, trim adapter sequences, filter and  
143 remove poor signal reads, and split the reads according to the barcode. FASTQ and/or BAM  
144 files were generated using the Torrent Suit plugin FileExporter v5.12. Automated data analysis  
145 was done with Torrent Suite™ Software using the Ion AmpliSeq™ RNA plug-in v.5.12 and  
146 target region AmpliSeq\_Mouse\_Transcriptome\_V1\_Designed.

147 Raw data was loaded into Transcriptome Analysis Console (4.0 Thremo Fisher Scientific, MA,  
148 EUA) and first filtered based on ANOVA eBayes using Limma package, applied to fold  
149 changes  $\leq -1.5$  or  $\geq 1.5$  between experimental and control conditions. Significant changes had  
150 a p value  $< 0.05$  and a false discovery rate  $< 0.2$ . Genes that significantly downregulated and  
151 upregulated by Meth in microglia, following the described criteria, are represented in **Supp.**

### 152 **Table 1.**

153 RNA-seq functional enrichment analysis using Gene Set Enrichment Analysis (GSEA) was  
154 performed by WEB-based Gene SeT AnaLysis Toolkit (WebGestalt)<sup>29</sup>. All detectable genes  
155 (**Supp. Table 2**) with their corresponding fold-change values were submitted to WebGestalt  
156 at [http:// www.webgestalt.org](http://www.webgestalt.org). GSEA was performed using the open-access available  
157 platforms, Wikipathways, KEEG and REACTOME with default settings. Enrichment scores for  
158 gene sets were calculated using an FDR cutoff of 0.05 and hypergeometric overlap analysis  
159 (**Supp. Table 3**). Genes retrieved from GSEA datasets were used for constructing a protein-

160 protein interaction network. Such network was generated using Omics Visualizer<sup>30</sup> and String  
161 applications<sup>31</sup> in Cytoscape.

162

### 163 **Primary cultures**

164 Primary mixed glial cultures were performed as previously described<sup>32,33</sup>. Briefly,  
165 neonatal Wistar rats or C57BL/6 mice were sacrificed, and their cerebral cortices dissected  
166 and digested with 0.07% trypsin-EDTA in the presence of DNase for 15min. Cells were  
167 dissociated and seeded in poly-D-lysine-coated T-flasks at  $1.5 \times 10^6$  cells/cm<sup>2</sup> in DMEM  
168 GlutaMAX™-I. Culture media was changed every three days up to 21 days. All cultures were  
169 kept at 37°C with 95% air/ 5%CO<sub>2</sub> in a humidified incubator.

170 To obtain purified microglia cultures, culture flasks were orbitally shaken (200 rpm,  
171 2h) to detach microglia. Then, culture media containing microglia were collected, centrifuged  
172 (453g, 5min), resuspended, and plated in glass coverslips at  $2.5 \times 10^5$  cells/cm<sup>2</sup> in DMEM-F12  
173 GlutaMAX™-I supplemented with 10% FBS, 0.1% Penicillin-Streptomycin and 1ng/ml GM-  
174 CSF. Purified microglia were cultured for 4-7 days. Immunolabeling with CD11b showed a  
175 purity of 95-99%.

176 For purified astrocyte cultures, mixed glial cell cultures were shaken to remove non-  
177 astrocytic cells. Astrocytes (adherent cells) were detached and split into non-coated T-flasks  
178 in DMEM GlutaMAX™-I. Split cultures were re-split at least four times to obtain purified  
179 cultures. After that, astrocytes were plated at  $2.5 \times 10^4$  cells/cm<sup>2</sup> in non-coated plates and  
180 maintained for 3 to 4 days.

181

### 182 **Astrocyte-conditioned medium and microglia treatment**

183 Astrocytes were seeded at a density of  $2.5 \times 10^4$  cells/cm<sup>2</sup>. After two days, cells were  
184 left untreated (control) or incubated with 100µM Meth for 24h. Untreated astrocyte-conditioned  
185 medium (ACM CT) and conditioned medium from Meth-treated astrocytes (ACM Meth) were  
186 collected, centrifuged for debris removal, and frozen at -80°C until used. To evaluate astrocytic  
187 conditioned media's effects, purified microglial cell cultures were exposed to ACM CT or ACM  
188 Meth for 24h.

189

### 190 **Flow cytometry**

191 Microglia and macrophages were analyzed, as we previously described<sup>33,34</sup>. Briefly,  
192 mice were anesthetized and perfused with ice-cold PBS. For single-cell suspensions, the  
193 whole brain was quickly removed and mechanically homogenized. The cell suspension was  
194 passed through a 100µm cell strainer and centrifuged over a discontinuous 70%/30% Percoll  
195 gradient. Cells on the interface were collected, pelleted, and resuspended in FACS buffer (2%  
196 BSA; 0.1% Sodium Azide in PBS). Cells were counted using the Countess TM automated

197 counter (Thermo Scientific, MA, USA). For microglia and macrophages characterization, the  
198 following antibodies were used: CD45-PE (103106), CD11b-Alexa647 (101218), Ly6C-  
199 PerCP/Cy5.5 (128012), CCR2-PE/Cy7 (150611), and MHCII-BV421 (107631), all obtained  
200 from BioLegend (CA, USA). Samples were evaluated on FACS Canto II (BD  
201 Immunocytometry Systems, CA, USA).

202

### 203 **Immunohistochemistry**

204 Mice were anesthetized and perfused with ice-cold PBS, followed by 4% PFA. Brains  
205 were post-fixed overnight, cryoprotected using sucrose gradients (15 and 30%), embedded in  
206 OCT, frozen and cryosectioned (coronally at 40 $\mu$ m, between Bregma positions 1.0mm-  
207 2.0mm) in the CM3050S cryostat (Leica Biosystems, Nussloch, DE). Brain sections were  
208 collected on adherent slides and stored at -20°C.

209 For immunolabeling, brain slides were defrosted and permeabilized with 0.25% Triton  
210 X-100 for 15min. Then, brain slices were blocked with 3% BSA, 0.1% Triton X-100 and 5%  
211 FBS for 1h. Primary antibodies were incubated overnight (4°C) under the manufacturer's  
212 recommendations. After washing, slices were incubated with corresponding secondary  
213 antibodies conjugated to Alexa Fluor for 2h (RT). After PBS washes, sections were mounted  
214 using Fluoroshield from Sigma-Aldrich and visualized under a TCS SP5 II confocal  
215 microscope (Leica Biosystems). All used antibodies were described in **Suppl. Table 4**.

216

### 217 **Immunocytochemistry**

218 Immunocytochemistry was performed as we previously described<sup>33,34</sup>. Briefly, after  
219 fixation with 4% PFA, cultures were permeabilized with 0.1% Triton X-100 or 10 min and  
220 blocked with 3% BSA for 1h. Cells were incubated with primary antibody under the  
221 manufacture's recommendations, washed and incubated with secondary antibodies  
222 conjugated with Alexa Fluor 488 or 568 for 1h (RT). Finally, cells were incubated with DAPI,  
223 mounted, and visualized using a DMI6000B inverted microscope (Leica Microsystems) with  
224 an HCX Plan Apo 63x/1.3 NA glycerol immersion objective. Images were acquired with 4x4  
225 binning using a digital CMOS camera (ORCA-Flash4.0 V2, Hamamatsu Photonics). All  
226 antibodies are described in **Suppl. Table 5**.

227

### 228 **Phagocytic assay**

229 Fluorescent latex beads (Sigma-Aldrich) were diluted in a culture medium (0,001%)  
230 and incubated for 1h. After that, cells were washed and fixed with 4% PFA.  
231 Immunocytochemistry for CD11b was performed, and the phagocytic efficiency of microglia  
232 was estimated as described elsewhere with minor modifications<sup>35</sup>.

233



## 234 **Reactive oxygen species determination by fluorescence microscopy**

235 Primary microglia cultures were incubated with CellROX® green reagent from Thermo-  
236 Fisher Scientific, according to manufacturer's recommendations, following PBS washing and  
237 fixation with 4% PFA.

238

## 239 **Fluorescent signals quantification and colocalization analysis**

240 For the intensity quantification, images were exported using the Leica LAS AF program  
241 in TIFF format (16-bit). Background subtraction of images, image segmentation, and  
242 determination of the intensity of the fluorescence signal was processed in FIJI software as  
243 before<sup>33</sup>. For colocalization analyses, images were acquired using an HCX Plan Apo 63x/1.4-  
244 0.6NA oil immersion objective in 16-bit sequential mode using bidirectional TCS mode at  
245 100Hz with the pinhole kept at one airy in the Leica TCS SP5 II confocal microscope. The  
246 Coloc2 plug-in in FIJI was used to establish TNF/GFAP channels' quantitative colocalization  
247 as before<sup>32</sup>.

248

## 249 **Total RNA extraction, cDNA synthesis, and qRT-PCR**

250 From brain tissue, RNA was extracted using the TRIzol™ (Ambion by Life  
251 Technologies, MA, USA). RNA from cell cultures was isolated using the RNeasy Mini Kit from  
252 Qiagen (Düsseldorf, DE). RNAs quality and concentration were determined using a NanoDrop  
253 ND-1000 Spectrophotometer. cDNA synthesis was performed using 1µg of total RNA using  
254 RT2 Easy First Strand kit from Qiagen. qRT-PCR was performed using iQ™ SYBR®Green  
255 Supermix on an iQ™5 multicolor real-time PCR detection system (Bio-Rad, CA, USA). All  
256 primers were obtained from Sigma-Aldrich and described in **Suppl. Table 6**. Raw data were  
257 analyzed using the  $\Delta\Delta$ CT method with Yhwaz serving as the internal control gene and results  
258 expressed in relative gene abundance.

259

## 260 **FRET assays**

261 Primary microglia or astrocyte were plated on plastic-bottom culture dishes  $\mu$ -  
262 Dish35mm (iBidi, Martinsried, DE) and transfected with FRET biosensor for glutamate  
263 (pDisplay FLIPE-600n, plasmid 13545), ROS (pFRET-HSP33 cys, plasmid 16076) or calcium  
264 (pcDNA-D1ER, plasmid 36325), all from Addgene (MA, USA) using jetPRIME® from Polyplus  
265 (NY, USA). Imaging was performed using a Leica DMI6000B inverted microscope, and images  
266 were processed in FIJI software exactly as before<sup>36</sup>.

267

## 268 **Elevated plus-maze (EPM)**

269 Anxiety-like behavior was assessed using the elevated plus maze (EPM) test precisely  
270 as we previously described<sup>21,37</sup>. The test was conducted in the dark phase of the light/dark

271 cycle. The mice's movement and location were analysed by an automated tracking system  
272 equipped with an infrared-sensitive camera (Smart Video Tracking Software v 2.5, Panlab,  
273 Harvard Apparatus). The maze, made of opaque grey polyvinyl, consisted of four arms  
274 arranged in a cross-shape; two closed arms have surrounding walls (18cm high), opposing  
275 two open arms (all arms 37x6cm). The apparatus was elevated at the height of 50cm. Each  
276 mouse was placed on the central platform facing an open arm and allowed to explore the  
277 maze for 5min.

278

### 279 **Statistical analysis**

280 A 95% confidence interval was used, and  $P < 0.05$  was considered statistically  
281 significant. Results were expressed as mean  $\pm$  SEM (standard error of the mean). Gene  
282 clusters were compared by contingency analysis using the Fisher's exact test and the  
283 Baptista-Pike method to calculate the odds-ratio. Experimental units in individual replicates  
284 were evaluated for Gaussian distribution using the D' & Pearson omnibus normality test. When  
285 comparing only two experimental groups, the unpaired Student t test with equal variance  
286 assumption was used for data with normal distribution, and the Mann-Whitney test was used  
287 otherwise. When comparing three or more groups, a one-way analysis of variance (ANOVA),  
288 followed by the Bonferroni or Tukey post hoc test was used for data with normal distribution,  
289 and the Kruskal-Wallis test followed by Dunn's multiple comparisons was used otherwise. We  
290 used a two-way ANOVA followed by the Sidak test to compare different groups with two  
291 independent variables. All quantifications were performed blinded. Statistical analysis was  
292 performed using the GraphPad Prism® software version 8.4.3.



## 293 Results

294

### 295 Microglia exposed to Meth display a core cell cycle-related transcriptomic signature

296 To clarify the action of Meth in microglia, we used a binge pattern of Meth  
297 administration to adult mice (**Suppl. Fig. 1A**) and conducted RNA-Seq analysis in flow  
298 cytometry-sorted microglia (CD11b<sup>+</sup>CD45<sup>Low</sup>CD206<sup>-</sup>) from whole brain tissue. Out of 23,930  
299 microglial transcripts identified in the transcriptome dataset, 207 were significantly altered after  
300 binge Meth administration (**Fig. 1A and Suppl. Tables 1 and 2**). To pinpoint the most relevant  
301 biological pathways altered in the microglial transcriptome after Meth exposure, we performed  
302 gene set enriched analysis (GSEA). GSEA using Wikipathways, KEGG, and REACTOME  
303 databases revealed a prominent upregulation of cell cycle-related pathways (including DNA  
304 Replication, mRNA processing, Eukaryotic Transcription Initiation, Homologous  
305 recombination, RNA polymerase, Mismatch repair, DNA Repair, DNA Double-Strand Break,  
306 G2/M DNA damage checkpoint, Mitotic Cell Cycle, Cell Cycle) (**Fig. 1B** and detailed data in  
307 **Suppl. Table 3**), possibly associated with Meth-induced microglial expansion. Of note, the  
308 TNF-alpha NF-kB and the NOD-like receptor signaling pathways, both associated with  
309 proinflammatory signaling, were also upregulated (**Fig. 1B**).

310 The combined cell cycle-related transcriptomic cluster (the top 50 upregulated  
311 transcripts are displayed as network in **Fig. 1C**) contained as highest altered transcripts the  
312 DNA primase small subunit (Prim1), the DNA polymerase epsilon catalytic subunit A (Pole),  
313 the DNA polymerase epsilon subunit 3 (Pole3), the translocated promoter region, nuclear  
314 basket protein (Tpr), and the DNA helicases MCM5 and MCM6 (**Fig. 1C**). Thus, initiation of  
315 DNA replication, DNA mismatch repair, homologous recombination, and telomere C-strand  
316 synthesis (licensed by the epsilon DNA polymerase complex and the MCM complex via 3'-5'  
317 exodeoxyribonuclease and 3'-5' DNA helicase activities) are plausibly the most strongly  
318 microglial pathways affected by Meth exposure.

319 Next, we compared our cluster of 207 differentially expressed transcripts upon Meth  
320 exposure with clusters previously reported for microglial signature program<sup>38,39</sup>, aging<sup>40</sup>,  
321 disease-associated (DAM)<sup>41</sup>, injury-related (IRM)<sup>40</sup>, drug exposure<sup>42,43</sup>, or the microglial  
322 engulfment module<sup>38</sup> (**Suppl. Fig. 1C and Suppl. Table 7**). Interestingly, we only found a  
323 positive association of our Meth-induced cluster with the aging clusters. These data indicate  
324 that Meth exposure does not affect the classical signature programs of healthy or diseased  
325 microglia but are in line with reports showing that Meth might foster cellular and tissue  
326 ageing<sup>44</sup>.

327

### 328 Meth activates microglia *in vivo*.

329           The increase in expression of cell cycle-related transcripts correlated with a significant  
330 increase in the number of Iba-1<sup>+</sup> cells on tissue sections obtained from the striatum and the  
331 hippocampus (**Fig. 1D**) of mice exposed to Meth when compared to saline-treated (control)  
332 animals. This increase in microglia numbers was further confirmed using flow cytometry (**Fig.**  
333 **1E**). We found also an increase in MHC-II expression in microglia (**Fig. 1F**). We also analyzed  
334 the brain macrophage population (CD11b<sup>+</sup>CD45<sup>High</sup>) and found no differences between Meth-  
335 treated and control mice in total, Ly6C<sup>+</sup> or Ly6C<sup>+</sup>/CCR2<sup>+</sup> macrophages (**Suppl. Fig. 2A**).  
336 Together, these results indicate that binge Meth administration causes microgliosis.

337

### 338 Meth activates microglia in an astrocyte dependent-manner

339           Microglia activation is thought to modify several of their morphological, molecular and  
340 functional properties. Therefore, using primary microglia cultures, we investigated whether  
341 exposure to Meth altered some of those properties. We found that Meth diminished the  
342 microglia capacity to phagocytose inert fluorescent beads (**Fig. 2A**) and did not increase the  
343 formation of ROS (**Fig. 2B**) or the expression of iNOS (**Fig. 2C**). We also observed no  
344 differences in the mRNA transcript abundance of the proinflammatory cytokines IL-1 $\beta$ , IL-6  
345 and TNF compared to saline-treated microglia (**Fig. 2D**). To further confirm that our microglia  
346 cultures were responsive to a classic proinflammatory stimulus, but not to Meth, we treated  
347 them with LPS, which as expected increased ROS formation and iNOS expression (**Suppl.**  
348 **Fig. 2B and C**). We also analyzed classic microglial anti-inflammatory markers and found no  
349 significant alterations in arginase 1 expression (**Fig. 2E**), nor in the amounts of mRNA  
350 transcripts IL-10 and TGF $\beta$  (**Fig. 2F**). We concluded that Meth does not activate microglia in  
351 a cell-autonomous manner and that the transcriptomic changes associated with microgliosis  
352 observed in vivo might result from crosstalk between microglia and other cell types.

353           Because astrocyte-derived signaling is essential in microglia activation<sup>45</sup>, we tested  
354 the hypothesis that astrocytes could mediate Meth-induced microglia activation. To do that,  
355 we exposed primary cortical microglia to conditioned media (CM) obtained from primary  
356 cortical astrocytes treated with Meth (ACM Meth) or CM from control astrocyte cultures (ACM  
357 CT). Neither Meth nor ACM Meth affected astrocytic or microglial viability (**Suppl. Fig. 2D-F**).  
358 Using the CellRox green reagent, we found an increase in ROS production in primary cortical  
359 microglia exposed to ACM Meth compared with cultures exposed to ACM CT (**Fig. 2G**). Using  
360 the FRET HSP biosensor<sup>46</sup>, we observed a consistent and fast increase (within 5 min) of ROS  
361 generation in living primary microglia exposed to ACM Meth (**Suppl. Fig. 3A**). Besides,  
362 primary cortical microglia treated with ACM Meth displayed higher mRNA levels of the  
363 proinflammatory markers iNOS, IL-1 $\beta$ , and IL-6, but not TNF (**Fig. 2H**). Primary cortical  
364 microglia exposed to ACM Meth also displayed enhanced iNOS expression compared with

365 cultures incubated with ACM CT (**Suppl. Fig. 3B**). We concluded that upon Meth exposure,  
366 astrocytes could induce microglial activation.

367

### 368 Meth causes glutamate release via TNF and IP<sub>3</sub>-dependent Ca<sup>2+</sup> mobilization in astrocytes

369 Astrocytes are critical players in regulating neuroinflammation<sup>47</sup>. Of note, our RNA-Seq  
370 data revealed a Meth-induced enrichment of gene transcripts associated with the TNF-alpha  
371 NF-kB Signaling Pathway (**Fig. 1B**). Besides, TNF has emerged as an essential mediator of  
372 brain homeostasis<sup>48</sup>. We observed increased TNF expression in specific brain regions  
373 following Meth exposure (**Suppl. Fig 3D**), which was also previously reported<sup>49</sup>. The secretion  
374 of high amounts of TNF activates TNF receptor 1 and leads to a massive release of glutamate  
375 from astrocytes<sup>50</sup>. Accordingly, we observed by double-labeling immunofluorescence an  
376 increase in TNF content in astrocytes (GFAP<sup>+</sup> cells) in the hippocampus of mice exposed to  
377 Meth (**Fig. 3A**), and using the glutamate-release FRET biosensor FLIPE600n<sup>SURFACE</sup> 51, we  
378 found that TNF promoted a fast and sustained release of glutamate from living cortical  
379 astrocytes (**Suppl. Fig. 3C**). In addition, Meth also caused robust glutamate release in cortical  
380 astrocytes from WT mice (**Fig. 3B**). However, Meth was inefficient in triggering glutamate  
381 release in cortical astrocytes from TNF-deficient mice (**Fig. 3B**), confirming that autocrine TNF  
382 signaling plays a crucial role in Meth-induced glutamate release from astrocytes.

383 Astrocytes can release glutamate from intracellular pools through various  
384 mechanisms, including Ca<sup>2+</sup>-dependent and -independent pathways<sup>52</sup>. To test whether  
385 glutamate release from astrocytes under Meth exposure is Ca<sup>2+</sup>-dependent, we chelated  
386 cytosolic Ca<sup>2+</sup> with BAPTA-AM and observed an inhibition of Meth-induced glutamate release  
387 (**Fig. 3C**), suggesting that elevation of cytosolic Ca<sup>2+</sup> is necessary for Meth-triggered astrocytic  
388 glutamate release.

389 The rise in cytosolic Ca<sup>2+</sup> required for glutamate release from astrocytes may originate  
390 from the endoplasmic reticulum (ER) through the Ca<sup>2+</sup>-release channel inositol triphosphate  
391 receptor (IP<sub>3</sub>R)<sup>53</sup>. Using the D1ER FRET biosensor<sup>54</sup>, which detects the efflux of Ca<sup>2+</sup> from the  
392 ER into the cytosol, we monitored the mobilization of Ca<sup>2+</sup> in living astrocytes exposed to Meth  
393 or TNF (**Suppl. Fig. 3E**). Treatment of primary cortical astrocytes with Meth (**Suppl. Fig. 3E,**  
394 **blue circles**) or TNF (**Suppl. Fig. 3E, red circles**) triggered a fast and sustained decrease in  
395 the FRET/CFP ratio of the D1ER biosensor, indicating that both Meth and TNF promoted the  
396 mobilization of Ca<sup>2+</sup> from the ER to the cytosol. To investigate the role of IP<sub>3</sub>R in Meth-induced  
397 Ca<sup>2+</sup>-mobilization, we used Xestospongin C (XeC)<sup>55</sup>, an IP<sub>3</sub>R antagonist. We observed that  
398 XeC abolished glutamate release in living primary astrocyte cultures exposed to Meth (**Fig.**  
399 **3C**) or TNF (**Suppl. Fig. 3F**), and concluded that IP<sub>3</sub>R-dependent Ca<sup>2+</sup> mobilization is involved  
400 in Meth-induced glutamate release.

401 To test whether in Meth-treated astrocytes, glutamate was released through an  
402 exocytic mechanism<sup>56</sup>, we used the tetanus toxin to prevent Ca<sup>2+</sup>-dependent assembling of  
403 the dnSNARE complex and the fusion of exocytic vesicles with the membrane<sup>57</sup>. In these  
404 conditions, we observed a large attenuation in the Meth-induced CFP/FRET ratio change of  
405 the FLIPE biosensor (**Fig. 3C**), indicating that, in astrocytes, Meth stimulates the exocytosis  
406 of glutamate-containing vesicles in a Ca<sup>2+</sup>-dependent manner.

407 Because TNF controls astrocytic glutamate release, we hypothesized that  
408 TNF/glutamate signaling might be directly involved in microglia activation by astrocytes that  
409 were exposed to Meth. Accordingly, we found that treating primary microglia with glutamate  
410 increased iNOS expression (**Fig. 3D**). Glutamate treatment also promoted fast and sustained  
411 ROS generation in living primary cortical microglia as revealed by using the FRET HSP ROS  
412 biosensor (**Fig. 3E**). While the CM obtained from WT astrocytes exposed to Meth promoted  
413 ROS generation in primary microglia (**Fig. 3F**), the CM obtained from TNF-deficient astrocytes  
414 exposed to Meth failed to increase microglial ROS production (**Fig. 3F**), confirming that  
415 TNF/glutamate signaling is necessary to induce microglial activation by astrocytes.

416

#### 417 TNF and IP<sub>3</sub>R2-dependent Ca<sup>2+</sup> mobilization are required for microglia activation in vivo

418 Because Meth activates microglia *via* TNF-to-IP<sub>3</sub>R signaling in astrocytes, we  
419 evaluated whether Meth-induced microgliosis required this signaling *in vivo*. Knowing that the  
420 IP<sub>3</sub>R isoform 2 is the primary IP<sub>3</sub> receptor in astrocytes and the major source of Ca<sup>2+</sup>-  
421 translocation from the ER into the cytosol in these cells<sup>58</sup>, we challenged IP<sub>3</sub>R2 KO, and TNF  
422 KO mice with binge Meth administration (as described in Suppl. Fig. 1A). We observed that  
423 the Meth-induced microgliosis in the striatum and in the hippocampus was prevented in both  
424 KO mice compared to WT (**Fig. 4A**). Consistently with these findings, flow cytometry showed  
425 that the Meth-induced increase in the microglia population was also prevented in TNF KO and  
426 IP<sub>3</sub>R2 KO mice (**Fig. 4B**).

427 Excessive glutamate and microglia overactivation can negatively affect behavior<sup>59</sup>.  
428 Because Meth-induced TNF production led to glutamate release from astrocytes in an IP<sub>3</sub>R-  
429 dependent manner and activated microglia, we hypothesized that blocking TNF or IP<sub>3</sub>R  
430 signaling could prevent the behavioral alteration elicited by Meth. When tested in EPM, WT  
431 mice exposed to Meth displayed increased time and distance traveled in the open arms (**Fig.**  
432 **4C**) and decreased frequency of stretch-attended postures (**Suppl. Fig. 4**), while the total  
433 traveled distance was lower than for the saline group (**Fig. 4C**). This behavioral pattern, which  
434 is consistent with decreased risk assessment and typical of psychostimulant intake, and was  
435 significantly attenuated in TNF or IP<sub>3</sub>R2 KO mice (**Fig. 4C**). These *in vivo* data confirm the  
436 relevance of the the TNF/Ca<sup>2+</sup> mobilization-signaling for Meth-induced microgliosis and  
437 behavioral effects.

## 438 Discussion

439

440 Although it was previously observed that Meth induces a microglia proinflammatory  
441 response *in vivo*<sup>25,60</sup>, the mechanisms involved in this process are still poorly understood. We  
442 found that Meth-induced microglia reactivity requires a crosstalk with astrocytes, mediated by  
443 glutamate release in a TNF- and IP<sub>3</sub>R/Ca<sup>2+</sup>-dependent manner and that blocking TNF-  
444 signaling prevented both microgliosis and the loss of risk assessment behavior elicited by  
445 Meth.

446 Consistently with previous findings<sup>61,62</sup>, our study shows that binge Meth caused  
447 microglial expansion and increased the expression of proinflammatory markers that are  
448 hallmarks of many neurodegenerative diseases<sup>63</sup>. The range of enriched pathways related to  
449 cell cycle modulation that associate with microglial expansion, confirms the relevance of this  
450 Meth-induced effect. To characterize the molecular mechanisms involved in Meth-induced  
451 microglia activation, we analysed Meth effects directly on purified microglia cultures. In  
452 contrast with a previous work reporting that Meth induces a proinflammatory response in an  
453 immortalized microglial cell line<sup>64</sup>, our results demonstrated that Meth does not directly induce  
454 a proinflammatory phenotype in primary microglia. Nonetheless, and corroborating our  
455 findings, Frank and colleagues observed that Meth fails to induce the expression of  
456 proinflammatory cytokines in microglial cultures despite up-regulating IL-1, IL-6, and TNF *in*  
457 *vivo*<sup>65</sup>. Likewise, our primary microglia cultures were highly responsive to LPS, excluding the  
458 possibility that the lack of a direct Meth effect could be due to microglia anergy<sup>65</sup>. Similarly,  
459 cocaine was reported to be ineffective in directly inducing the expression of microglial TNF  
460 mRNA levels<sup>66</sup> *in vitro*.

461 Because Meth activated microglia *in vivo*, we tested the hypothesis that this activation  
462 could result from an interplay with other cell types. Reactive astrocytes<sup>67</sup> are observed in  
463 several models of Meth exposure<sup>68-70</sup>, including human cerebral organoids<sup>71</sup>, and persistently  
464 associated with increased neurotoxicity and neuroinflammation, strengthening the likelihood  
465 of an astrocyte-mediated microglial response. Astrocytes seem to control immune activation  
466 *via* secretion of multiple molecular factors<sup>72,73</sup>. Among them, TNF emerged as an essential  
467 mediator of brain homeostasis<sup>48</sup>. Increased. We demonstrated that Meth increased TNF  
468 content in hippocampal astrocytes *in vivo* and *in vitro*, suggesting that TNF may play an  
469 important role in microglia activation by Meth-sensitized astrocytes. Indeed, it has been  
470 reported that an autocrine/paracrine TNF-dependent TNF receptor 1 activation promotes  
471 glutamate release from astrocytes<sup>50</sup>, while TNF inhibitors strongly reduce glutamate release  
472 in cultured astrocytes<sup>74</sup>. In line with this, we also observed that while Meth triggered rapid and  
473 sustained glutamate release from astrocytes obtained from wild-type mice, it failed to do so in  
474 astrocytes obtained from TNF-deficient mice. In addition, TNF downregulates the glutamate

475 transporter EAAT-2 on astrocytes, compromising glutamate clearance from the extracellular  
476 space, which contributes to an hyperglutamate state and promotes excitotoxic glutamate  
477 signaling<sup>75,76</sup>. Excitotoxicity associates positively with the progression of several  
478 neurodegenerative diseases<sup>77</sup>. Meth, by acting on the trace amine-associated receptor 1  
479 (TAAR1), induces excitotoxicity through downregulation of EAAT-2 transcription and activity in  
480 astrocytes<sup>78</sup>. In this context, our results strongly suggest that glutamate is a critical modulator  
481 in Meth-induced microglial activation. Corroborating this hypothesis, we observed that Meth  
482 failed to induce microgliosis and loss of risk-assessment behavior in TNF-deficient mice.  
483 Interestingly, TNF-deficient mice were previously reported to self-administer more Meth<sup>79</sup>,  
484 which according to our data, may also result from reduced astrocyte-microglia reactivity, and  
485 not only from increased dopamine availability, as previously suggested<sup>26</sup>.

486 Astrocytes release glutamate through different pathways, including Ca<sup>2+</sup>-  
487 dependent and -independent mechanisms<sup>52</sup>. The ER serves as a major source for astrocytic  
488 mobilization of intracellular Ca<sup>2+</sup> *via* IP<sub>3</sub>R<sup>12,80</sup>. We evaluated the involvement of IP<sub>3</sub> in Meth-  
489 induced glutamate release from astrocytes and confirmed that it occurs in an IP<sub>3</sub>-dependent  
490 way. Accordingly, when we administered Meth to IP<sub>3</sub>R2-deficient mice, microgliosis and  
491 behavioral changes were prevented, suggesting that astrocytic IP<sub>3</sub>R/Ca<sup>2+</sup> signaling is required  
492 for microglia activation triggered by Meth.

493 Astrocytes were also recently demonstrated as critical modulators of the reward  
494 system, responding to amphetamine-elicited dopaminergic signaling and regulating excitatory  
495 neurotransmission through ATP/adenosine activation of neuronal A<sub>1</sub> adenosine receptors<sup>81</sup>.  
496 Our results provide further mechanistic insight reinforcing the astrocytes' role in reward and  
497 addiction by regulating microglial reactivity.

498 Collectively, our findings show that astrocytes cause the activation of microglia in acute  
499 Meth-exposure *via* glutamate release in a TNF/IP<sub>3</sub>R2-Ca<sup>2+</sup>-dependent manner (**Fig. 5**),  
500 leading to behavioural alterations. Comprehending how microglial reactivity and  
501 neuroinflammation will adapt throughout prolonged exposure to Meth, particularly during  
502 withdrawal, will further increase the translational significance of our findings and contribute to  
503 identifying novel molecular targets with therapeutic value in psychostimulant abuse.



## 504 **Funding and Disclosure**

505 This work was financed by FEDER - Fundo Europeu de Desenvolvimento Regional  
506 funds through the COMPETE 2020 - Operational Programme for Competitiveness and  
507 Internationalisation (POCI), Portugal 2020, and by Portuguese funds through FCT - Fundação  
508 para a Ciência e a Tecnologia/Ministério da Ciência (FCT), Tecnologia e Ensino Superior in  
509 the framework of the project POCI-01-0145-FEDER-030647 (PTDC/SAU-TOX/30647/2017)  
510 in TS lab. FEDER Portugal (Norte-01-0145-FEDER-000008000008—Porto Neurosciences  
511 and Neurologic Disease Research Initiative at I3S, supported by Norte Portugal Regional  
512 Operational Programme (NORTE 2020), under the PORTUGAL 2020 Partnership Agreement,  
513 through the European Regional Development Fund (ERDF); FCOMP-01-0124-FEDER-  
514 021333). CCP and RS hold employment contracts financed by national funds through FCT –  
515 in the context of the program-contract described in paragraphs 4, 5, and 6 of art. 23 of Law  
516 no. 57/2016, of August 29, as amended by Law no. 57/2017 of July 2019. TC and AM were  
517 supported by FCT (SFRH/BD/117148/2016 and IF/00753/2014). Work in JBR lab was  
518 supported by the FCT project PTDC/ MED-NEU/31318/2017. JFO was also supported by FCT  
519 projects PTDC/MED-NEU/31417/2017 and POCI-01-0145-FEDER-016818; Bial Foundation  
520 Grants 207/14 and 037/18, by National funds, through FCT - project UIDB/50026/2020 and  
521 UIDP/50026/2020; and by the projects NORTE-01-0145-FEDER-000013 and NORTE-01-  
522 0145-FEDER-000023, supported by Norte Portugal Regional Operational Programme  
523 (NORTE 2020), under the PORTUGAL 2020 Partnership Agreement, through the European  
524 Regional Development Fund (ERDF).

525  
526 We acknowledge the support of the following i3S Scientific Platforms: Animal Facility,  
527 Cell Culture and Genotyping (CCGen), Translational Cytometry Unit (TraCy), and Advanced  
528 Light Microscopy (ALM), a member of the national infrastructure PPBI-Portuguese Platform of  
529 BioImaging (POCI-01–0145-FEDER-022122). The RNAseq technique was performed at the  
530 Genomics i3S Scientific Platform with the assistance of Mafalda Rocha as a result of the  
531 GenomePT project (POCI-01-0145-FEDER-022184), supported by COMPETE 2020 -  
532 Operational Programme for Competitiveness and Internationalization (POCI), Lisboa Portugal  
533 Regional Operational Programme (Lisboa2020), Algarve Portugal Regional Operational  
534 Programme (CRESC Algarve2020), under the PORTUGAL 2020 Partnership Agreement,  
535 through the European Regional Development Fund (ERDF), and by FCT. We also  
536 acknowledge Rui Appelberg for generously supplying TNF KO mice, and Maria Summavielle  
537 for her contribution in assembling the figures illustrating this publication.

## 538 **Conflict of interest**

540 The authors declare no conflict of interest.

541  
542  
543  
544  
545  
546  
547  
548  
549  
550  
551  
552  
553  
554  
555  
556  
557  
558  
559  
560  
561  
562  
563  
564  
565  
566  
567  
568  
569  
570  
571  
572  
573  
574  
575  
576  
577  
578  
579  
580  
581  
582  
583  
584  
585  
586  
587  
588  
589  
590  
591  
592  
593

## References

1. Thanos PK, Kim R, Delis F, Ananth M, Chachati G, Rocco MJ *et al.* Chronic Methamphetamine Effects on Brain Structure and Function in Rats. *PLoS One* 2016; **11**(6): e0155457.
2. Chang X, Sun Y, Zhang Y, Muhai J, Lu L, Shi J. A Review of Risk Factors for Methamphetamine-Related Psychiatric Symptoms. *Front Psychiatry* 2018; **9**: 603.
3. Moszczynska A, Callan SP. Molecular, Behavioral, and Physiological Consequences of Methamphetamine Neurotoxicity: Implications for Treatment. *J Pharmacol Exp Ther* 2017; **362**(3): 474-488.
4. Northrop NA, Halpin LE, Yamamoto BK. Peripheral ammonia and blood brain barrier structure and function after methamphetamine. *Neuropharmacology* 2016; **107**: 18-26.
5. Shaerzadeh F, Streit WJ, Heysieattalab S, Khoshbouei H. Methamphetamine neurotoxicity, microglia, and neuroinflammation. *J Neuroinflammation* 2018; **15**(1): 341.
6. Yamamoto BK, Raudensky J. The role of oxidative stress, metabolic compromise, and inflammation in neuronal injury produced by amphetamine-related drugs of abuse. *J Neuroimmune Pharmacol* 2008; **3**(4): 203-217.
7. Cadet JL, Bisagno V. Glial-neuronal ensembles: partners in drug addiction-associated synaptic plasticity. *Front Pharmacol* 2014; **5**: 204.
8. Miguel-Hidalgo JJ. The role of glial cells in drug abuse. *Curr Drug Abuse Rev* 2009; **2**(1): 72-82.
9. Beardsley PM, Hauser KF. Glial modulators as potential treatments of psychostimulant abuse. *Adv Pharmacol* 2014; **69**: 1-69.
10. Araque A, Carmignoto G, Haydon PG, Oliek SH, Robitaille R, Volterra A. Gliotransmitters travel in time and space. *Neuron* 2014; **81**(4): 728-739.
11. Tzschenke TM, Schmidt WJ. Glutamatergic mechanisms in addiction. *Mol Psychiatry* 2003; **8**(4): 373-382.
12. Bazargani N, Attwell D. Astrocyte calcium signaling: the third wave. *Nat Neurosci* 2016; **19**(2): 182-189.
13. Clark KH, Wiley CA, Bradberry CW. Psychostimulant abuse and neuroinflammation: emerging evidence of their interconnection. *Neurotox Res* 2013; **23**(2): 174-188.
14. Krasnova IN, Justinova Z, Cadet JL. Methamphetamine addiction: involvement of CREB and neuroinflammatory signaling pathways. *Psychopharmacology (Berl)* 2016; **233**(10): 1945-1962.
15. Salter MW, Beggs S. Sublime microglia: expanding roles for the guardians of the CNS. *Cell* 2014; **158**(1): 15-24.



- 594 16. Harms AS, Lee JK, Nguyen TA, Chang J, Ruhn KM, Trevino I *et al.* Regulation of  
595 microglia effector functions by tumor necrosis factor signaling. *Glia* 2012; **60**(2): 189-  
596 202.  
597
- 598 17. Prinz M, Priller J. Microglia and brain macrophages in the molecular age: from origin  
599 to neuropsychiatric disease. *Nat Rev Neurosci* 2014; **15**(5): 300-312.  
600
- 601 18. Biber K, Moller T, Boddeke E, Prinz M. Central nervous system myeloid cells as drug  
602 targets: current status and translational challenges. *Nat Rev Drug Discov* 2016;  
603 **15**(2): 110-124.  
604
- 605 19. Stephenson J, Nutma E, van der Valk P, Amor S. Inflammation in CNS  
606 neurodegenerative diseases. *Immunology* 2018; **154**(2): 204-219.  
607
- 608 20. Subhramanyam CS, Wang C, Hu Q, Dheen ST. Microglia-mediated  
609 neuroinflammation in neurodegenerative diseases. *Semin Cell Dev Biol* 2019; **94**:  
610 112-120.  
611
- 612 21. Socodato R, Henriques JF, Portugal CC, Almeida TO, Tedim-Moreira J, Alves RL *et al.*  
613 Daily alcohol intake triggers aberrant synaptic pruning leading to synapse loss  
614 and anxiety-like behavior. *Sci Signal* 2020; **13**(650): eaba5754.  
615
- 616 22. ter Horst JP, de Kloet ER, Schachinger H, Oitzl MS. Relevance of stress and female  
617 sex hormones for emotion and cognition. *Cell Mol Neurobiol* 2012; **32**(5): 725-735.  
618
- 619 23. Li X, Zima AV, Sheikh F, Blatter LA, Chen J. Endothelin-1-induced arrhythmogenic  
620 Ca<sup>2+</sup> signaling is abolished in atrial myocytes of inositol-1,4,5-trisphosphate(IP<sub>3</sub>)-  
621 receptor type 2-deficient mice. *Circ Res* 2005; **96**(12): 1274-1281.  
622
- 623 24. Guerra-Gomes S, Sousa N, Pinto L, Oliveira JF. Functional Roles of Astrocyte  
624 Calcium Elevations: From Synapses to Behavior. *Frontiers in Cellular Neuroscience*  
625 2018; **11**(427).  
626
- 627 25. Thomas DM, Walker PD, Benjamins JA, Geddes TJ, Kuhn DM. Methamphetamine  
628 neurotoxicity in dopamine nerve endings of the striatum is associated with microglial  
629 activation. *J Pharmacol Exp Ther* 2004; **311**(1): 1-7.  
630
- 631 26. Nakajima A, Yamada K, Nagai T, Uchiyama T, Miyamoto Y, Mamiya T *et al.* Role of  
632 tumor necrosis factor- $\alpha$  in methamphetamine-induced drug dependence and  
633 neurotoxicity. *J Neurosci* 2004; **24**(9): 2212-2225.  
634
- 635 27. Krasnova IN, Cadet JL. Methamphetamine toxicity and messengers of death. *Brain*  
636 *Res Rev* 2009; **60**(2): 379-407.  
637
- 638 28. Galatro TF, Vainchtein ID, Brouwer N, Boddeke E, Eggen BJL. Isolation of Microglia  
639 and Immune Infiltrates from Mouse and Primate Central Nervous System. *Methods*  
640 *Mol Biol* 2017; **1559**: 333-342.  
641
- 642 29. Liao Y, Wang J, Jaehrig EJ, Shi Z, Zhang B. WebGestalt 2019: gene set analysis  
643 toolkit with revamped UIs and APIs. *Nucleic Acids Research* 2019; **47**(W1): W199-  
644 W205.  
645
- 646 30. Legeay M, Doncheva NT, Morris JH, Jensen LJ. Visualize omics data on networks  
647 with Omics Visualizer, a Cytoscape App. *F1000Res* 2020; **9**: 157.  
648

- 649 31. Doncheva NT, Morris JH, Gorodkin J, Jensen LJ. Cytoscape StringApp: Network  
650 Analysis and Visualization of Proteomics Data. *J Proteome Res* 2019; **18**(2): 623-  
651 632.
- 652  
653 32. Portugal CC, Socodato R, Canedo T, Silva CM, Martins T, Coreixas VS *et al.*  
654 Caveolin-1-mediated internalization of the vitamin C transporter SVCT2 in microglia  
655 triggers an inflammatory phenotype. *Sci Signal* 2017; **10**(472).
- 656  
657 33. Socodato R, Portugal CC, Canedo T, Rodrigues A, Almeida TO, Henriques JF *et al.*  
658 Microglia Dysfunction Caused by the Loss of Rhoa Disrupts Neuronal Physiology  
659 and Leads to Neurodegeneration. *Cell Rep* 2020; **31**(12): 107796.
- 660  
661 34. Andrade EB, Magalhaes A, Puga A, Costa M, Bravo J, Portugal CC *et al.* A mouse  
662 model reproducing the pathophysiology of neonatal group B streptococcal infection.  
663 *Nat Commun* 2018; **9**(1): 3138.
- 664  
665 35. Koenigsnecht J, Landreth G. Microglial phagocytosis of fibrillar beta-amyloid  
666 through a beta1 integrin-dependent mechanism. *J Neurosci* 2004; **24**(44): 9838-  
667 9846.
- 668  
669 36. Socodato R, Melo P, Ferraz-Nogueira JP, Portugal CC, Relvas JB. A Protocol for  
670 FRET-Based Live-Cell Imaging in Microglia. *STAR Protocols* 2020: 100147.
- 671  
672 37. Mateus-Pinheiro A, Alves ND, Patrício P, Machado-Santos AR, Loureiro-Campos E,  
673 Silva JM *et al.* AP2γ controls adult hippocampal neurogenesis and modulates  
674 cognitive, but not anxiety or depressive-like behavior. *Molecular Psychiatry* 2017;  
675 **22**(12): 1725-1734.
- 676  
677 38. Ayata P, Badimon A, Strasburger HJ, Duff MK, Montgomery SE, Loh Y-HE *et al.*  
678 Epigenetic regulation of brain region-specific microglia clearance activity. *Nature*  
679 *Neuroscience* 2018; **21**(8): 1049-1060.
- 680  
681 39. Butovsky O, Jedrychowski MP, Moore CS, Cialic R, Lanser AJ, Gabriely G *et al.*  
682 Identification of a unique TGF-β–dependent molecular and functional signature in  
683 microglia. *Nature Neuroscience* 2014; **17**(1): 131-143.
- 684  
685 40. Hammond TR, Dufort C, Dissing-Olesen L, Giera S, Young A, Wysoker A *et al.*  
686 Single-Cell RNA Sequencing of Microglia throughout the Mouse Lifespan and in the  
687 Injured Brain Reveals Complex Cell-State Changes. *Immunity* 2019; **50**(1): 253-  
688 271.e256.
- 689  
690 41. Keren-Shaul H, Spinrad A, Weiner A, Matcovitch-Natan O, Dvir-Szternfeld R, Ulland  
691 TK *et al.* A Unique Microglia Type Associated with Restricting Development of  
692 Alzheimer’s Disease. *Cell* 2017; **169**(7): 1276-1290.e1217.
- 693  
694 42. Najera JA, Bustamante EA, Bortell N, Morsey B, Fox HS, Ravasi T *et al.*  
695 Methamphetamine abuse affects gene expression in brain-derived microglia of SIV-  
696 infected macaques to enhance inflammation and promote virus targets. *BMC*  
697 *immunology* 2016; **17**(1): 7-7.
- 698  
699 43. Savell KE, Tuscher JJ, Zipperly ME, Duke CG, Phillips RA, Bauman AJ *et al.* A  
700 dopamine-induced gene expression signature regulates neuronal function and  
701 cocaine response. *Science Advances* 2020; **6**(26): eaba4221.
- 702

- 703 44. Astarita G, Avanesian A, Grimaldi B, Realini N, Justinova Z, Panlilio LV *et al.*  
704 Methamphetamine Accelerates Cellular Senescence through Stimulation of De Novo  
705 Ceramide Biosynthesis. *PLOS ONE* 2015; **10**(2): e0116961.  
706
- 707 45. Liddel SA, Marsh SE, Stevens B. Microglia and Astrocytes in Disease: Dynamic  
708 Duo or Partners in Crime? *Trends Immunol* 2020; **41**(9): 820-835.  
709
- 710 46. Socodato R, Portugal CC, Canedo T, Domith I, Oliveira NA, Paes-de-Carvalho R *et al.*  
711 *c*-Src deactivation by the polyphenol 3-O-caffeoylquinic acid abrogates reactive  
712 oxygen species-mediated glutamate release from microglia and neuronal  
713 excitotoxicity. *Free Radic Biol Med* 2015; **79**: 45-55.  
714
- 715 47. Ransohoff RM, Brown MA. Innate immunity in the central nervous system. *J Clin*  
716 *Invest* 2012; **122**(4): 1164-1171.  
717
- 718 48. Rossi D. Astrocyte physiopathology: At the crossroads of intercellular networking,  
719 inflammation and cell death. *Prog Neurobiol* 2015; **130**: 86-120.  
720
- 721 49. Goncalves J, Martins T, Ferreira R, Milhazes N, Borges F, Ribeiro CF *et al.*  
722 Methamphetamine-induced early increase of IL-6 and TNF-alpha mRNA expression  
723 in the mouse brain. *Ann N Y Acad Sci* 2008; **1139**: 103-111.  
724
- 725 50. Bezzi P, Domercq M, Brambilla L, Galli R, Schols D, De Clercq E *et al.* CXCR4-  
726 activated astrocyte glutamate release via TNFalpha: amplification by microglia  
727 triggers neurotoxicity. *Nat Neurosci* 2001; **4**(7): 702-710.  
728
- 729 51. Okumoto S, Looger LL, Micheva KD, Reimer RJ, Smith SJ, Frommer WB. Detection  
730 of glutamate release from neurons by genetically encoded surface-displayed FRET  
731 nanosensors. *Proc Natl Acad Sci U S A* 2005; **102**(24): 8740-8745.  
732
- 733 52. Harada K, Kamiya T, Tsuboi T. Gliotransmitter Release from Astrocytes: Functional,  
734 Developmental, and Pathological Implications in the Brain. *Front Neurosci* 2015; **9**:  
735 499.  
736
- 737 53. Parpura V, Grubisic V, Verkhratsky A. Ca(2+) sources for the exocytotic release of  
738 glutamate from astrocytes. *Biochim Biophys Acta* 2011; **1813**(5): 984-991.  
739
- 740 54. Palmer AE, Jin C, Reed JC, Tsien RY. Bcl-2-mediated alterations in endoplasmic  
741 reticulum Ca2+ analyzed with an improved genetically encoded fluorescent sensor.  
742 *Proc Natl Acad Sci U S A* 2004; **101**(50): 17404-17409.  
743
- 744 55. Gafni J, Munsch JA, Lam TH, Catlin MC, Costa LG, Molinski TF *et al.*  
745 Xestospongins: potent membrane permeable blockers of the inositol 1,4,5-  
746 trisphosphate receptor. *Neuron* 1997; **19**(3): 723-733.  
747
- 748 56. Verkhratsky A, Matteoli M, Parpura V, Mothet JP, Zorec R. Astrocytes as secretory  
749 cells of the central nervous system: idiosyncrasies of vesicular secretion. *EMBO J*  
750 2016; **35**(3): 239-257.  
751
- 752 57. Schiavo G, Matteoli M, Montecucco C. Neurotoxins affecting neuroexocytosis.  
753 *Physiol Rev* 2000; **80**(2): 717-766.  
754
- 755 58. Petravicz J, Fiacco TA, McCarthy KD. Loss of IP3 receptor-dependent Ca2+  
756 increases in hippocampal astrocytes does not affect baseline CA1 pyramidal neuron  
757 synaptic activity. *J Neurosci* 2008; **28**(19): 4967-4973.

- 758  
759 59. Blank T, Prinz M. Microglia as modulators of cognition and neuropsychiatric  
760 disorders. *Glia* 2013; **61**(1): 62-70.  
761  
762 60. Sekine Y, Ouchi Y, Sugihara G, Takei N, Yoshikawa E, Nakamura K *et al.*  
763 Methamphetamine causes microglial activation in the brains of human abusers. *J*  
764 *Neurosci* 2008; **28**(22): 5756-5761.  
765  
766 61. Buchanan JB, Sparkman NL, Johnson RW. A neurotoxic regimen of  
767 methamphetamine exacerbates the febrile and neuroinflammatory response to a  
768 subsequent peripheral immune stimulus. *J Neuroinflammation* 2010; **7**: 82.  
769  
770 62. Loftis JM, Choi D, Hoffman W, Huckans MS. Methamphetamine causes persistent  
771 immune dysregulation: a cross-species, translational report. *Neurotox Res* 2011;  
772 **20**(1): 59-68.  
773  
774 63. Block ML, Zecca L, Hong JS. Microglia-mediated neurotoxicity: uncovering the  
775 molecular mechanisms. *Nat Rev Neurosci* 2007; **8**(1): 57-69.  
776  
777 64. Coelho-Santos V, Goncalves J, Fontes-Ribeiro C, Silva AP. Prevention of  
778 methamphetamine-induced microglial cell death by TNF-alpha and IL-6 through  
779 activation of the JAK-STAT pathway. *J Neuroinflammation* 2012; **9**: 103.  
780  
781 65. Frank MG, Adhikary S, Sobesky JL, Weber MD, Watkins LR, Maier SF. The danger-  
782 associated molecular pattern HMGB1 mediates the neuroinflammatory effects of  
783 methamphetamine. *Brain Behav Immun* 2016; **51**: 99-108.  
784  
785 66. Lewitus GM, Konefal SC, Greenhalgh AD, Pribiag H, Augereau K, Stellwagen D.  
786 Microglial TNF-alpha Suppresses Cocaine-Induced Plasticity and Behavioral  
787 Sensitization. *Neuron* 2016; **90**(3): 483-491.  
788  
789 67. Escartin C, Galea E, Lakatos A, O'Callaghan JP, Petzold GC, Serrano-Pozo A *et al.*  
790 Reactive astrocyte nomenclature, definitions, and future directions. *Nature*  
791 *Neuroscience* 2021.  
792  
793 68. Narita M, Miyatake M, Narita M, Shibasaki M, Shindo K, Nakamura A *et al.* Direct  
794 evidence of astrocytic modulation in the development of rewarding effects induced by  
795 drugs of abuse. *Neuropsychopharmacology* 2006; **31**(11): 2476-2488.  
796  
797 69. Bortell N, Basova L, Semenova S, Fox HS, Ravasi T, Marcondes MC. Astrocyte-  
798 specific overexpressed gene signatures in response to methamphetamine exposure  
799 in vitro. *J Neuroinflammation* 2017; **14**(1): 49.  
800  
801 70. Du SH, Qiao DF, Chen CX, Chen S, Liu C, Lin Z *et al.* Toll-Like Receptor 4 Mediates  
802 Methamphetamine-Induced Neuroinflammation through Caspase-11 Signaling  
803 Pathway in Astrocytes. *Front Mol Neurosci* 2017; **10**: 409.  
804  
805 71. Dang J, Tiwari SK, Agrawal K, Hui H, Qin Y, Rana TM. Glial cell diversity and  
806 methamphetamine-induced neuroinflammation in human cerebral organoids. *Mol*  
807 *Psychiatry* 2020.  
808  
809 72. Dong Y, Benveniste EN. Immune function of astrocytes. *Glia* 2001; **36**(2): 180-190.  
810  
811 73. Farina C, Aloisi F, Meinl E. Astrocytes are active players in cerebral innate immunity.  
812 *Trends Immunol* 2007; **28**(3): 138-145.

- 813  
814 74. Domercq M, Brambilla L, Pilati E, Marchaland J, Volterra A, Bezzi P. P2Y1 receptor-  
815 evoked glutamate exocytosis from astrocytes: control by tumor necrosis factor-alpha  
816 and prostaglandins. *J Biol Chem* 2006; **281**(41): 30684-30696.  
817  
818 75. Sitcheran R, Gupta P, Fisher PB, Baldwin AS. Positive and negative regulation of  
819 EAAT2 by NF-kappaB: a role for N-myc in TNFalpha-controlled repression. *EMBO J*  
820 2005; **24**(3): 510-520.  
821  
822 76. Wang Z, Pekarskaya O, Bencheikh M, Chao W, Gelbard HA, Ghorpade A *et al.*  
823 Reduced expression of glutamate transporter EAAT2 and impaired glutamate  
824 transport in human primary astrocytes exposed to HIV-1 or gp120. *Virology* 2003;  
825 **312**(1): 60-73.  
826  
827 77. Doble A. The role of excitotoxicity in neurodegenerative disease: implications for  
828 therapy. *Pharmacol Ther* 1999; **81**(3): 163-221.  
829  
830 78. Cisneros IE, Ghorpade A. Methamphetamine and HIV-1-induced neurotoxicity: role  
831 of trace amine associated receptor 1 cAMP signaling in astrocytes.  
832 *Neuropharmacology* 2014; **85**: 499-507.  
833  
834 79. Yan Y, Nitta A, Koseki T, Yamada K, Nabeshima T. Dissociable role of tumor  
835 necrosis factor alpha gene deletion in methamphetamine self-administration and cue-  
836 induced relapsing behavior in mice. *Psychopharmacology (Berl)* 2012; **221**(3): 427-  
837 436.  
838  
839 80. Volterra A, Liaudet N, Savtchouk I. Astrocyte Ca(2)(+) signalling: an unexpected  
840 complexity. *Nat Rev Neurosci* 2014; **15**(5): 327-335.  
841  
842 81. Corkrum M, Covelo A, Lines J, Bellocchio L, Pisansky M, Loke K *et al.* Dopamine-  
843 Evoked Synaptic Regulation in the Nucleus Accumbens Requires Astrocyte Activity.  
844 *Neuron* 2020; **105**(6): 1036-1047 e1035.  
845

## 846 **Figure Legends**

847  
848 **Figure 1.** Meth triggers microglial expansion in the brain.

849

850 **A:** Volcano plot depicting differentially expressed genes of isolated microglia from brains of  
851 mice administered with Meth vs Saline (n=3 mice). Non-differentially expressed genes are  
852 shown with gray dots, red dots represent significantly upregulated genes and blue dots  
853 represent downregulated genes.

854 **B:** Top 10 enriched pathways revealed by Wikiphathways, KEEG and Reactome databases  
855 using Gen Set Enrichment Analysis (GSEA).

856 **C:** Network analysis of enriched gene sets involved in cell cycle. Network represents the top  
857 of 50 upregulated genes related to cell cycle, upon Meth treatment.

858 **D:** Representative confocal imaging of striatal or hippocampal sections from mice  
859 administered with binge Meth or saline (CT) and immunostained for Iba-1. Graphs display the

860 number of Iba1<sup>+</sup> cells with mean and SEM (3/4 sections *per* animal from n=3 mice). \*p<0.05  
861 (unpaired t test). Scale bars, 50µm.

862 **E:** Flow cytometry analyses of microglia cells (CD11b<sup>+</sup> CD45<sup>Low</sup>) isolated from the brains of  
863 mice administered with binge Meth or saline (CT) (n=5 animals for each group). The graph  
864 displays the percentage of microglia cells with mean and SEM. \*p<0.05 (unpaired t test).

865 **F:** Expression of MHCII by flow cytometry in microglia (CD11b<sup>+</sup> CD45<sup>Low</sup>) isolated from the  
866 brains of mice administered with binge Meth or saline (CT) (n=5 animals for each group). The  
867 graph displays the frequency of microglial cells expressing the MHCII marker with mean and  
868 SEM. \*p<0.05 (unpaired t test).



869 **Figure 2.** Microglia activation triggered by Meth requires Astrocytes.

870

871 **A:** Fluorescence imaging of CD11b (red) in primary cortical microglia incubated with  
872 microbeads (green) and treated with 100 $\mu$ M Meth for 24h (n=3 independent cultures). Graph  
873 (means and SEM) displays phagocytic efficiency. \*p<0.05 (unpaired t test). Scale bar, 10 $\mu$ m.

874 **B:** Fluorescence imaging of primary cortical microglia incubated with the CellRox<sup>®</sup> green  
875 reagent and treated with 100 $\mu$ M Meth for 24h (n=3 independent cultures). Graph (means and  
876 SEM) displays the CellRox<sup>®</sup> intensity normalized to the Control values (unpaired t test). Scale  
877 bar, 10 $\mu$ m.

878 **C:** Fluorescence imaging of primary cortical microglia immunolabeled for iNOS (green) treated  
879 with 100 $\mu$ M Meth for 24h (n=3 independent cultures). Graph (means and SEM) displays iNOS  
880 intensity normalized to the Control values (unpaired t test). Scale bar, 10 $\mu$ m.

881 **D:** qRT-PCR for IL-1 $\beta$ , IL-6 or TNF from primary cortical microglia treated with 100 $\mu$ M Meth  
882 for 3h or 24h (n=3 independent cultures). Graphs (means and SEM) display the indicated  
883 transcripts' mRNA expression levels (unpaired t test).

884 **E:** Fluorescence imaging of arginase in primary cortical microglia treated with 100 $\mu$ M Meth for  
885 24h (n=3 independent cultures). Graph (means and SEM) displays arginase intensity  
886 normalized to the CT values (unpaired t test). Scale bar, 10 $\mu$ m.

887 **F:** qRT-PCR for IL-10 or TGF $\beta$  from primary cortical microglia treated with 100 $\mu$ M Meth for 3h  
888 or 24h (n=3 independent cultures). Graphs (means and SEM) display the indicated transcripts'  
889 mRNA expression levels (unpaired t test).

890 **G:** Fluorescence imaging of primary cortical microglia (n=3 independent cultures) incubated  
891 with the CellRox<sup>®</sup> green reagent and then exposed to conditioned media from primary cortical  
892 astrocytes (ACM) treated with 100 $\mu$ M Meth or not (CT). Graph (means and SEM) displays the  
893 CellRox intensity normalized to the ACM CT values. \*p<0.05 (unpaired t test). Scale bar,  
894 10 $\mu$ m.

895 **H:** qRT-PCR for iNOS (C), IL-1 $\beta$  (D), IL-6 (E), or TNF (F) from primary cortical microglia  
896 exposed to ACM CT or ACM Meth for 24h (n=3-5 independent cultures). Graphs (means and  
897 SEM) display the mRNA fold change for the indicated transcripts.

898 **Figure 3.** Meth activates microglia via astrocytic TNF production.

899

900 **A:** Confocal imaging of hippocampal sections from mice treated with Meth or saline (CT) and  
901 immunostained for GFAP (green) and TNF (red). Graphs display the GFAP/TNF colocalization  
902 puncta (upper graph) or GFAP intensity (bottom graph) normalized to the CT values (3/4  
903 sections *per* animal from n=3 mice). \*p<0.05 (unpaired t test). Scale bars, 50µm

904 **B:** Primary cortical astrocytes from WT or TNF KO mice expressing the glutamate release  
905 FRET biosensor (FLIPE) were exposed to Meth 100µM. Time-lapses of CFP/FRET ratio  
906 changes for the FLIPE biosensor (normalized at 0 min) shows the maximum effect of Meth in  
907 both genotypes and are coded according to the scale (n=3-8 cells pooled across 2-3  
908 independent experiments). Scale bars, 10µm

909 **C:** Primary cortical astrocytes expressing the glutamate release FRET biosensor (FLIPE) were  
910 exposed to Meth, BAPTA-AM (10µM) + Meth 100µM (upper panels), Xestosponginc (XeC;  
911 500nM) + Meth 100µM (middle panels) or Tetanus toxin (Tet; 500nM) + Meth (bottom panels).  
912 Time-lapses of CFP/FRET ratio changes for the FLIPE biosensor (normalized at 0 min) show  
913 the maximum effect of Meth and are coded according to the scale (n=5-7 cells pooled across  
914 3 independent experiments). \*p<0.05 (two-way ANOVA vs CT 0 min); # p<0.05 (two-way  
915 ANOVA vs CT Meth). Scale bars, 10µm.

916 **D:** Fluorescence imaging of primary cortical microglia immunolabeled for iNOS and treated  
917 with glutamate 100µM (n=3 independent cultures). Graph (means and SEM) displays iNOS  
918 intensity normalized to the CT. \*p<0.05 (Mann-Whitney test). Scale bar, 10µm.

919 **E:** Primary cortical microglia expressing the ROS FRET biosensor (HSP) were exposed to  
920 glutamate 100µM. Time-lapses of CFP/FRET ratio changes for the HSP biosensor  
921 (normalized at 0 min) shows the maximum effect of Meth and are coded according to the scale  
922 (n=5 cells pooled across two independent experiments). \*p<0.05. Scale bars, 10µm.

923 **F:** Primary cortical microglia from WT or TNF KO mice expressing the ROS FRET biosensor  
924 HSP were incubated with ACM CT and then exposed to ACM Meth 100µM. Time-lapses of  
925 CFP/FRET ratio changes for the HSP biosensor (normalized at 0 min) show the maximum  
926 effect of Meth and are coded according to the scale (n=4 cells pooled across two independent  
927 experiments). \*p<0.05, §non-significant. Scale bars, 10µm.



928 **Figure 4.** TNF or IP<sub>3</sub>R2 deficiency prevents Meth-induced microgliosis and behavioral  
929 changes

930

931 **A:** Confocal imaging of striatal or hippocampal sections from WT, IP<sub>3</sub>R2 KO, or TNF KO mice  
932 administered with binge Meth (3/4 sections *per* animal from n=3 mice) or saline (CT; n=3) and  
933 immunostained for Iba-1. Graphs (means and SEM) display the number of Iba-1+ cells  
934 \*p<0.001 WT-CT vs. WT-Meth; §non-significant (IP<sub>3</sub>R2 KO-CT vs. IP<sub>3</sub>R2 KO-Meth and #non-  
935 significant TNF KO-CT vs. TNF KO-Meth). Two-way ANOVA with the Sidak post hoc analysis.  
936 Scale bars, 50µm.

937 **B:** Flow cytometry analysis of microglia cells (CD11b+ CD45Low) isolated from WT, IP<sub>3</sub>R2  
938 KO, or TNF KO mice injected with Meth or saline (CT) (n=5-9 animals per group). The graph  
939 displays the percentage of microglia cells with mean and SEM. \*p<0.05 WT-CT vs. WT-Meth;  
940 §non-significant IP<sub>3</sub>R2 KO-CT vs. IP<sub>3</sub>R2 KO-Meth and #non-significant TNF KO-CT vs. TNF  
941 KO-Meth. Two-way ANOVA with Fisher's LSD post hoc analysis.

942 **C:** WT, IP<sub>3</sub>R2 KO, and TNF KO animals were evaluated in the EPM 24 hours after being a  
943 binge pattern of Meth or saline (CT) administration (n=6-13 animals). CT and Meth-treated  
944 mice displayed significant differences in the time spent in the open arms (OA) in the distance  
945 traveled in the OA, and in total distance traveled. Graphs display means and SEM. \*p<0.05,  
946 WT-CT vs. WT-Meth; §non-significant IP<sub>3</sub>R2 KO-CT vs. IP<sub>3</sub>R2 KO-Meth and #non-significant  
947 TNF KO-CT vs. TNF KO-Meth. Two-way ANOVA with the Sidak post hoc analysis.

948 **Figure 5.** Meth-induced microglia activation occurs via astrocytes.

949

950 **A:** Exposure to Meth induces astrocytic sensitization (1). Meth-sensitized astrocytes secrete  
951 soluble factors (2) that will act on microglia cells, inducing their activation.

952 **B:** In astrocytes, Meth triggers the production (1) and secretion (2) of TNF. TNF acts on  
953 astrocytic TNF receptors in an autocrine/paracrine manner, leading to the activation of PLC  
954 (3). TNF-induced PLC activation produces the second messenger IP<sub>3</sub> (4) that interacts with  
955 IP<sub>3</sub> receptors on the ER (5). Activation of IP<sub>3</sub>R2 promotes Ca<sup>2+</sup>-mobilization from the ER into  
956 the cytosol (6), consequently increasing glutamate release (7). Increased glutamate and TNF  
957 content in the extracellular milieu promotes the activation of microglia (8). TNF: Tumor  
958 necrosis factor; PLC: Phospholipase C; IP<sub>3</sub>: Inositol (1,3,4) phosphate; ER: Endoplasmic  
959 reticulum; Ca<sup>2+</sup>: Calcium ions.

960 **Supplementary Figure 1.**

961

962 **A:** Schematic representation of binge Meth administration.

963 **B:** WT, IP<sub>3</sub>R2 KO, and TNF KO mice were administered saline (CT) or Meth. The whisker  
964 plots represent the median (line within the box), maximum (top whisker) and minimum (bottom  
965 whisker) values of mice's body temperature during the Meth administration protocol.  
966 Temperatures were evaluated at 13 time points, each point represents the mean temperature  
967 (n=3 animals *per* group) for one timepoint.

968 **C:** Venn's diagrams representing cluster analysis comparing the 207 Meth-altered genes  
969 cluster found in our RNA.-seq analysis, with clusters previously reported for healthy<sup>38,39</sup>,  
970 aging<sup>40</sup>, disease-associated (DAM)<sup>41</sup>, injured<sup>40</sup>, drug exposed microglia<sup>42,43</sup>, or with clusters  
971 previously associated to specific microglia functions<sup>38</sup>. Comparisons were conducted by  
972 contingency analysis, using the Fisher's exact test and the Baptista-Pike method to calculate  
973 the odds-ratio. Significance was set at p<0.05. A comprehensive list of the shared genes in  
974 each case is available in **Suppl. Table 7.**

975 **Supplementary Figure 2.**

976

977 **A:** Flow cytometry analyses macrophages (CD11b+ CD45high) isolated from the brains of  
978 mice injected with Meth or saline (CT) (n=5 animals for each group). Graphs display with mean  
979 and SEM of the percentage of macrophages, the percentage of macrophages expressing  
980 activation markers such as Ly6C+ and Ly6C+CCR2+.

981 **B:** Primary cortical microglia cells incubated with the CellRox green reagent and treated with  
982 1µM LPS (n=3 different cultures). Graph (means and SEM) displays the CellRox intensity  
983 normalized to the control values (unpaired t test). Scale bar, 10µm.

984 **C:** Fluorescence imaging of primary cortical microglia immunolabeled for iNOS treated with  
985 1µM LPS (n=3 independent cultures). Graph (means and SEM) displays iNOS intensity  
986 normalized to the Control values (unpaired t test). Scale bar, 10µm.

987 **D:** Viability of astrocytes were examined by Hoechst staining under 100µM Meth. Graph  
988 represent (means and SEM) the percentage of cell viability upon Meth exposure compared to  
989 control (CT) condition.

990 **E:** Viability of microglial cells were examined by Hoechst staining under 100µM Meth. Graph  
991 represent (means and SEM) the percentage of cell viability upon Meth exposure compared to  
992 control (CT) condition.

993 **F:** Viability of microglia were examined by Hoechst staining under ACM Meth exposure. Graph  
994 represent (means and SEM) the percentage cell viability upon ACM Meth exposure compared  
995 to control condition (ACM CT).

996 **Supplementary Figure 3.**

997

998 **A:** Primary cortical microglia expressing the ROS FRET biosensor (HSP) were incubated with  
999 ACM CT (left panel) and then exposed to ACM Meth (right panel). Time-lapses of CFP/FRET  
1000 ratio changes for the HSP biosensor (normalized at 0 min) are shown according to the scale  
1001 (n=4 cells pooled across two independent experiments). Scale bars, 10 $\mu$ m.

1002 **B:** Fluorescence imaging of primary cortical microglia immunolabeled for iNOS (green) and F-  
1003 actin (grey; labeled with Alexa Fluor 647 Phalloidin obtained from Thermo Scientific (MA,  
1004 USA)) and treated with ACM CT or ACM Meth for 24h (n=3 independent experiments). Graph  
1005 (means and SEM) displays iNOS intensity normalized to the ACM CT. \*p<0.05 (unpaired t  
1006 test). Scale bar, 10 $\mu$ m.

1007 **C:** Primary cortical astrocytes expressing the glutamate release FRET biosensor (FLIPE) were  
1008 exposed to TNF (50nM). Time-lapses of CFP/FRET ratio changes for the FLIPE biosensor  
1009 (normalized at 0 min) are shown according to the scale (n=6 cells pooled across two  
1010 independent experiments). Scale bars, 10 $\mu$ m.

1011 **D:** qRT-PCR for TNF, IL-1 $\beta$  and IL-6 from the striatum or hippocampus of mice administered  
1012 with saline or binge Meth and sacrificed 24h after (n=4-5 mice *per* group). Graphs (means and  
1013 SEM) display the fold change of indicated transcripts. \*p<0.05 and \*\*p<0.01 (unpaired t test).

1014 **E:** Primary cortical astrocytes expressing the endoplasmic reticulum calcium release FRET  
1015 biosensor (D1ER) were exposed to Meth (100 $\mu$ M) (upper panels; blue circles) or TNF (50nM)  
1016 (bottom panels; red circles). Time-lapses of CFP/FRET ratio changes for the D1ER biosensor  
1017 (normalized at 0 min) are shown according to the scale (n=3-4 cells pooled across 2-3  
1018 independent experiments). Scale bars, 10 $\mu$ m.

1019 **F:** Primary cortical astrocytes expressing the glutamate release FRET biosensor (FLIPE) were  
1020 exposed to TNF (50nM) (upper panels; black circles) or XestosponginC (500nM) + TNF  
1021 (50nM) (bottom panels; lilac circles). Time-lapses of CFP/FRET ratio changes for the FLIPE  
1022 biosensor (normalized at 0 min) are shown according to the scale (n=4 cells pooled across  
1023 two independent experiments). Scale bars, 20 $\mu$ m.

1024 **Supplementary Figure 4.**

1025

1026 **A:** WT animals were evaluated in the EPM 24 hours after being administered with saline (CT)  
1027 or binge Meth (n=11-13 animals *per* group). CT and Meth-treated mice displayed significant  
1028 differences in the frequency of stretch-attend postures (SAP). The graph displays the mean and  
1029 SEM. \*\* $p < 0.01$  (unpaired t test).

1030 **B:** WT animals were evaluated in the EPM 24 hours after being administered with saline (CT)  
1031 or binge Meth (n=11-13 animals per group). CT and Meth-treated mice displayed significant  
1032 differences in the frequency of protected head dipping. The graph displays the mean and SEM.  
1033 \* $p < 0.05$  (unpaired t test).

1034 **C:** WT animals were evaluated in the EPM 24 hours after being administered with saline (CT)  
1035 or binge Meth (n=11-13 animals per group). CT and Meth-treated mice displayed no  
1036 differences regarding the latency to enter in open arms. The graph displays the mean and  
1037 SEM.

**Supplementary Table 4.** Antibodies used for immunohistochemistry

| <b>Antibody</b>              | <b>Dilution</b> | <b>Company</b>              |
|------------------------------|-----------------|-----------------------------|
| <b>GFAP</b>                  | 1:500           | Abcam (CAM, UK)             |
| <b>Iba-1</b>                 | 1:500           | Wako (CA, USA)              |
| <b>TNF</b>                   | 1:500           | Peprotech (LND, UK)         |
| <b>Anti-mouse Alexa 488</b>  | 1:1000          | Life Technologies (CA, USA) |
| <b>Anti-rabbit Alexa 568</b> | 1:1000          | Life Technologies (CA, USA) |

**Supplementary Table 5.** Antibodies used for immunocytochemistry

| <b>Antibody</b>              | <b>Dilution</b> | <b>Company</b>                     |
|------------------------------|-----------------|------------------------------------|
| <b>Arginase 1</b>            | 1:100           | Santa Cruz Biotechnology (TX, USA) |
| <b>CD11b</b>                 | 1:200           | Abcam (CAM, UK)                    |
| <b>iNOS</b>                  | 1:200           | Santa Cruz Biotechnology (TX, USA) |
| <b>Anti-mouse Alexa 488</b>  | 1:1000          | Life Technologies (CA, USA)        |
| <b>Anti-rabbit Alexa 568</b> | 1:1000          | Life Technologies (CA, USA)        |



**Supplementary Table 6.** Primer sequences used in qRT-PCR

| <b>Primer</b>                  | <b>Forward (5' - 3')</b> | <b>Reverse (5' - 3')</b> |
|--------------------------------|--------------------------|--------------------------|
| <b>IL-10</b>                   | ATCCGGGGTGACAATAACTG     | TGTCCAGCTGGTCCTTCTTT     |
| <b>IL-1<math>\beta</math></b>  | TAAGCCAACAAGTGGTATTC     | AGGTATAGATTCTTCCCCTTG    |
| <b>IL-6</b>                    | ACTCATCTTGAAAGCACTTG     | GTCCACAAACTGATATGCTTAG   |
| <b>iNOS</b>                    | AGCCGTAACAAAGGAAATAG     | ATGCTGGAACATTTCTGATG     |
| <b>TGF-<math>\beta</math></b>  | TGAGTGGCTGTCTTTTGACG     | GTTTGGGACTGATCCCATTG     |
| <b>TNF-<math>\alpha</math></b> | CTCACACTCAGATCATCTTC     | GAGAACCTGGGAGTAGATAAG    |
| <b>Ywhaz</b>                   | GATGAAGCCATTGCTGAACTTG   | GTCTCCTTGGGTATCCGATGTC   |

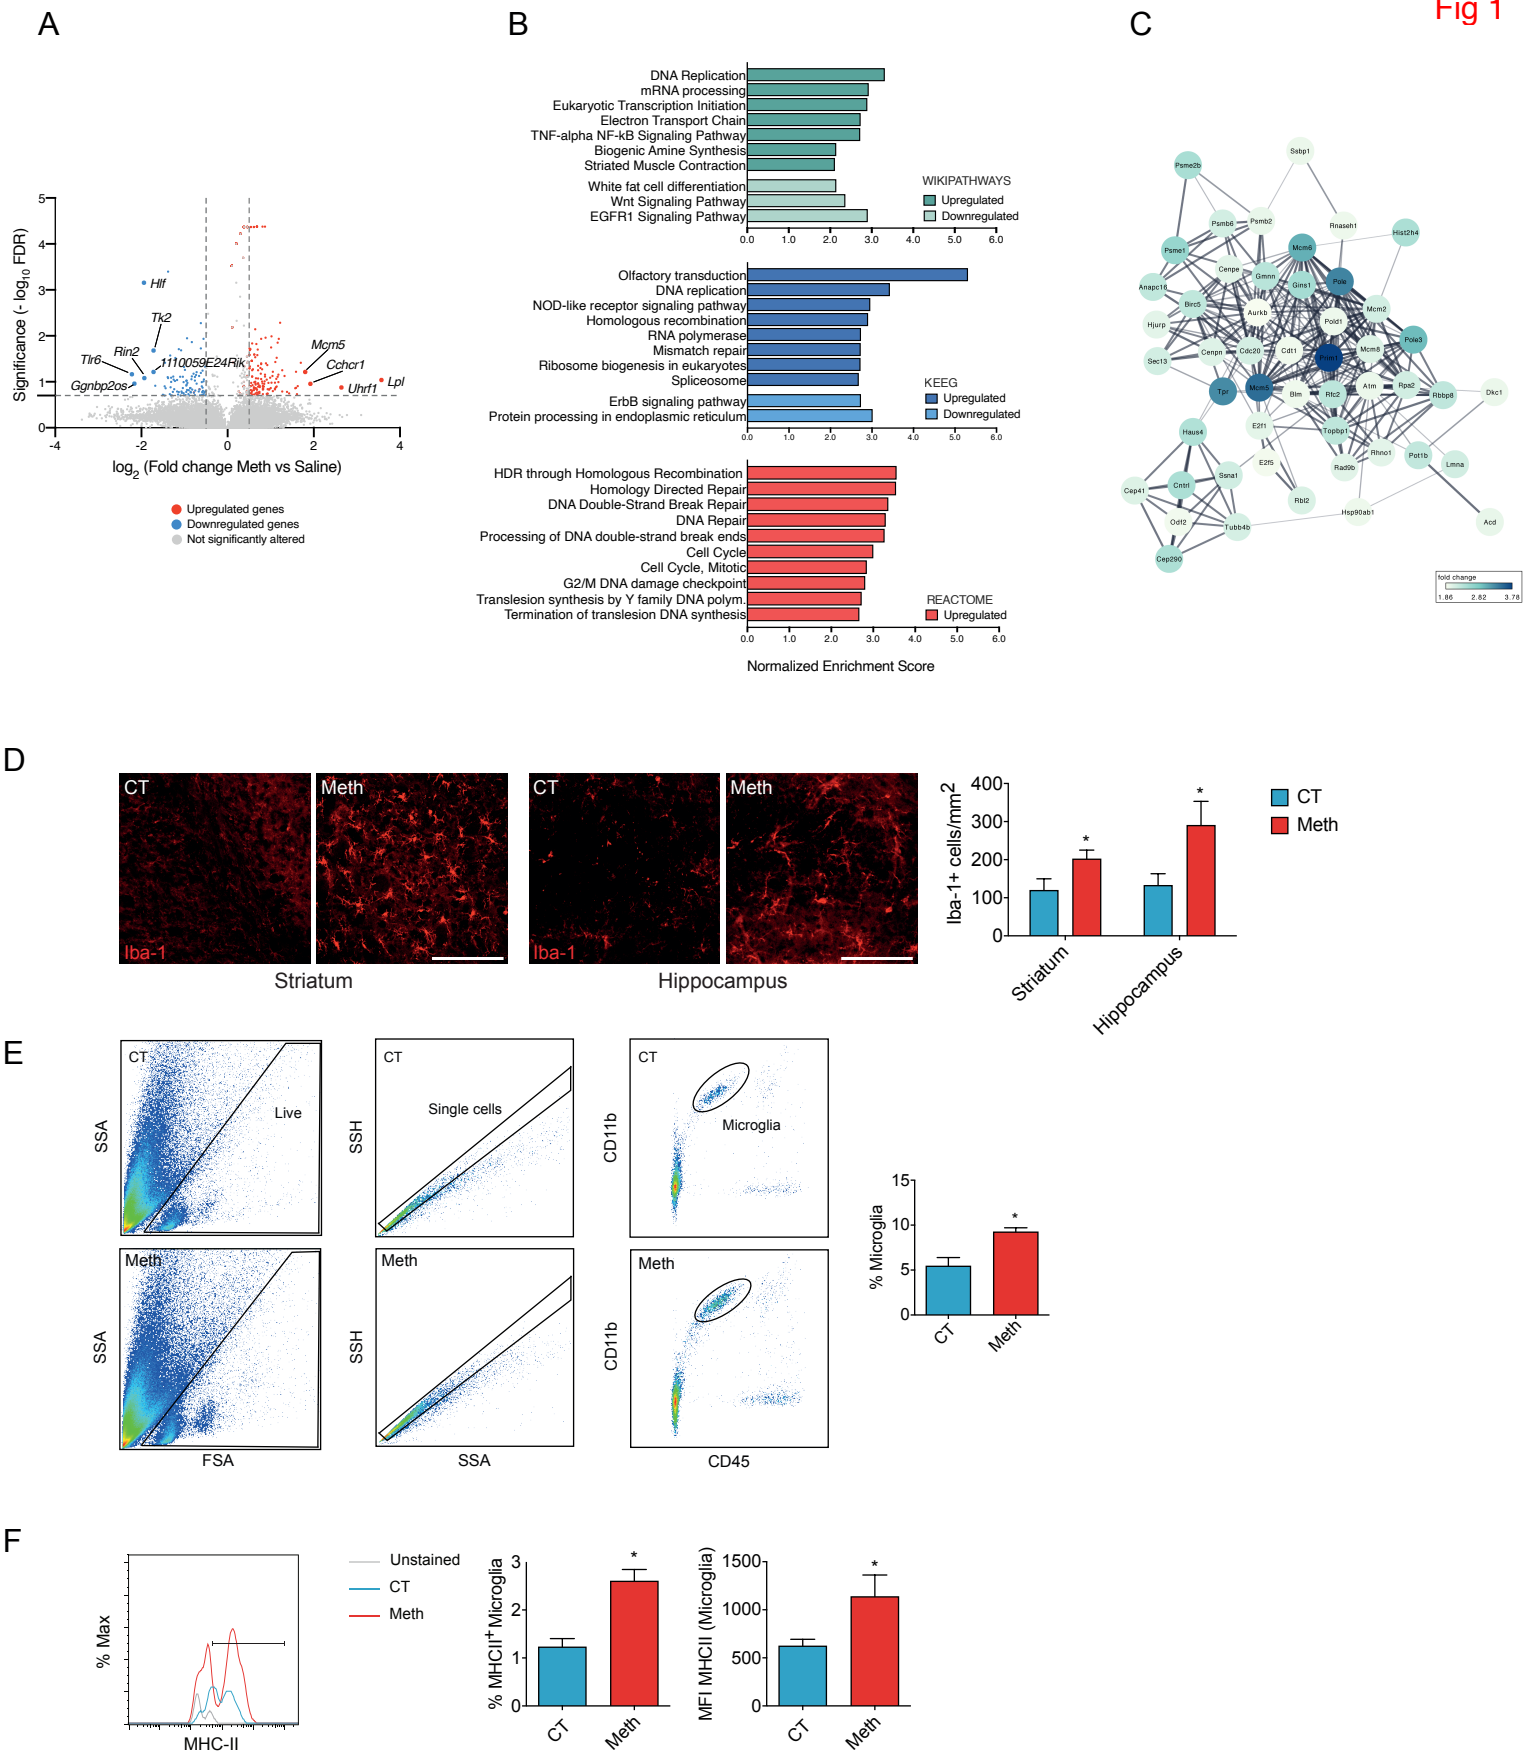

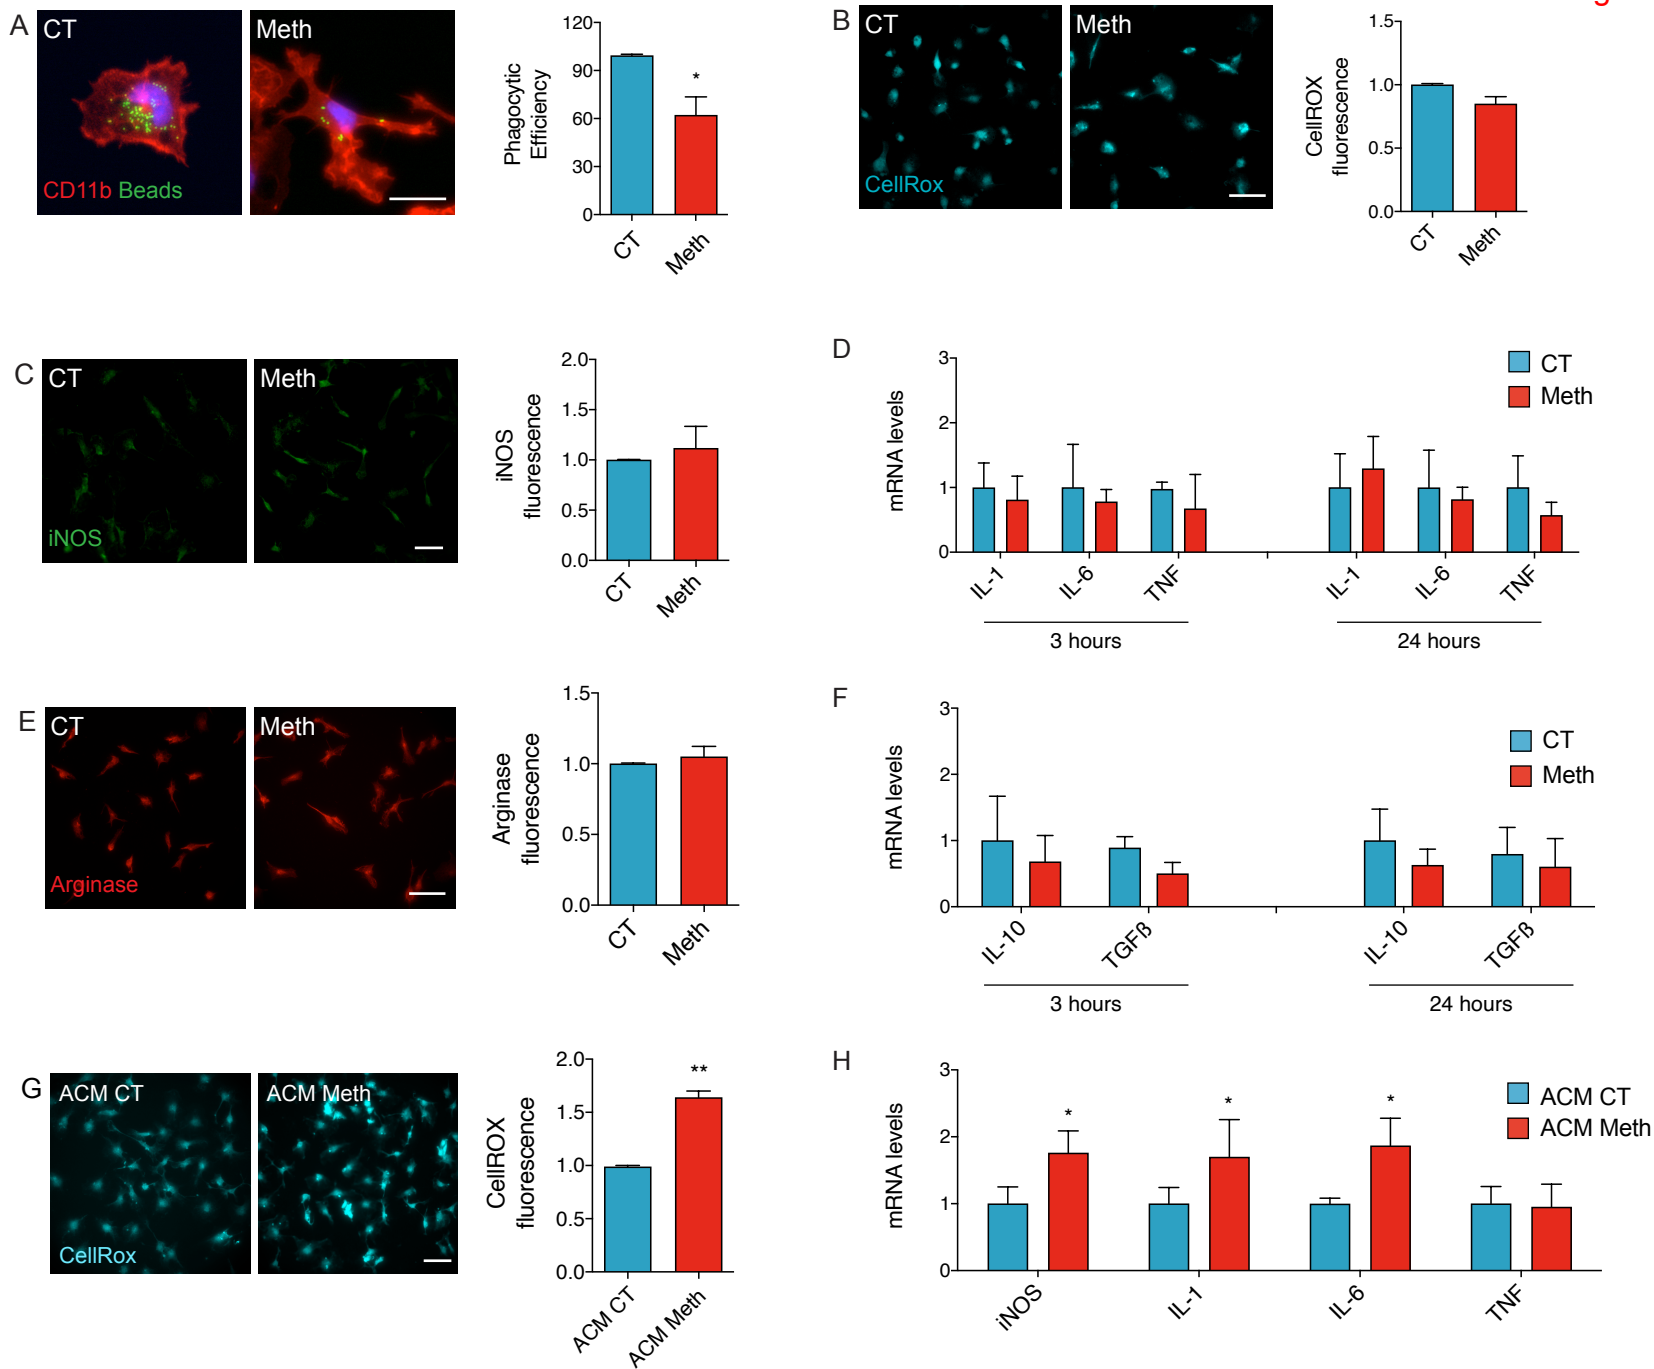

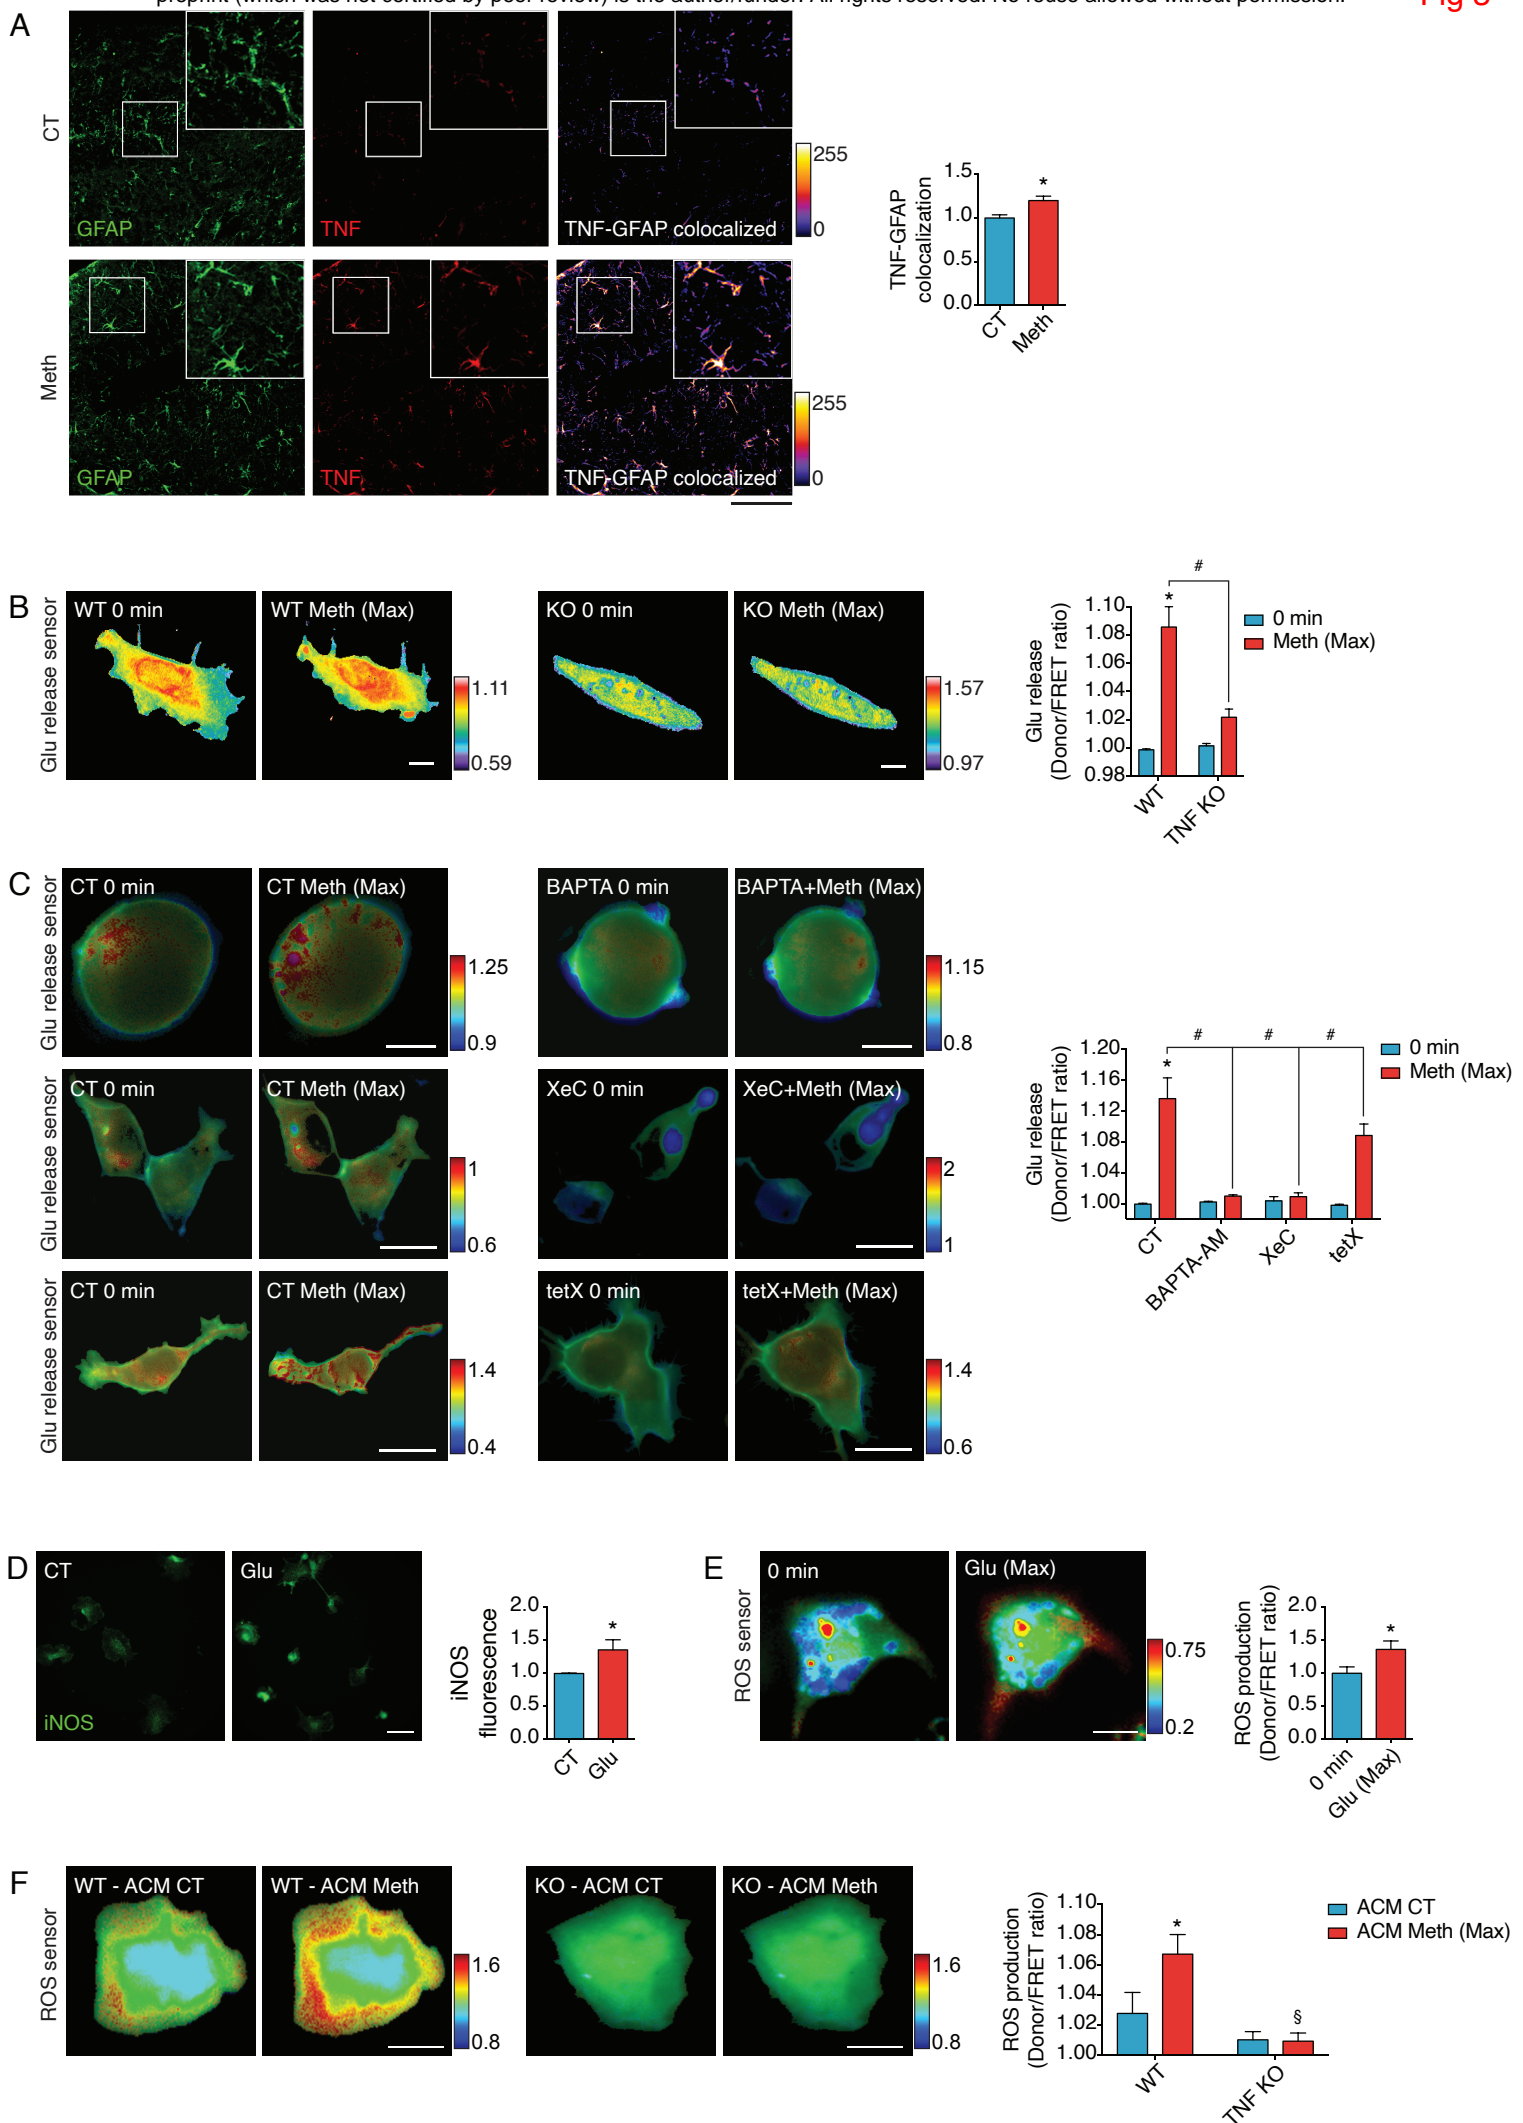

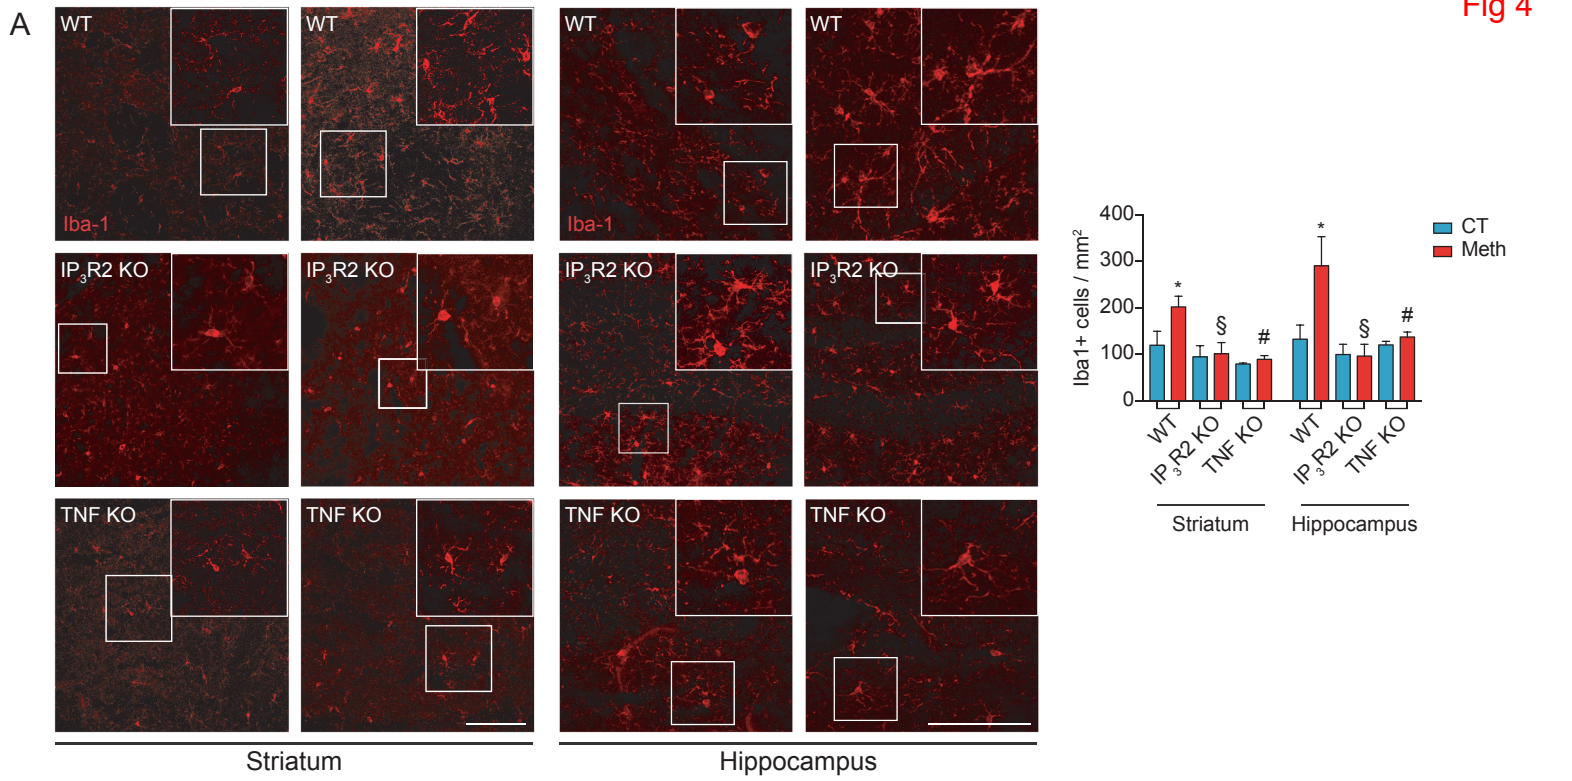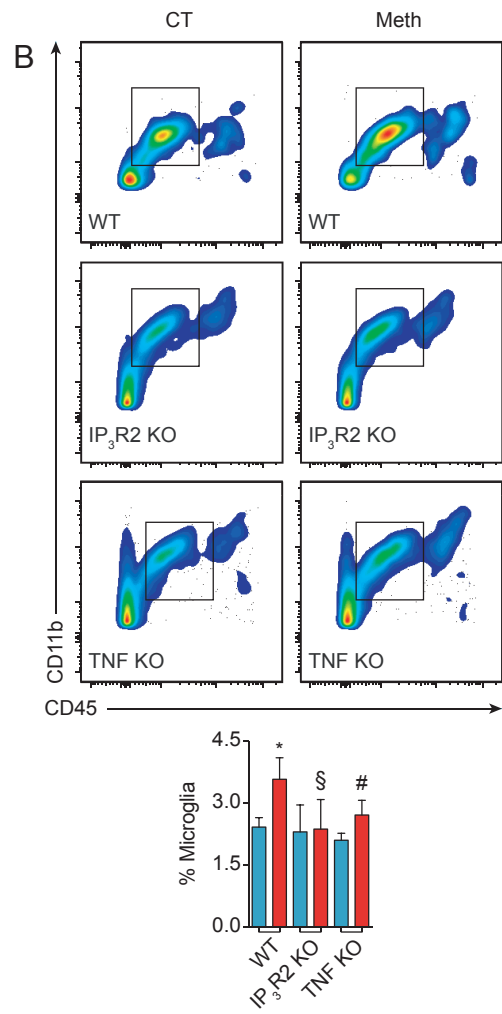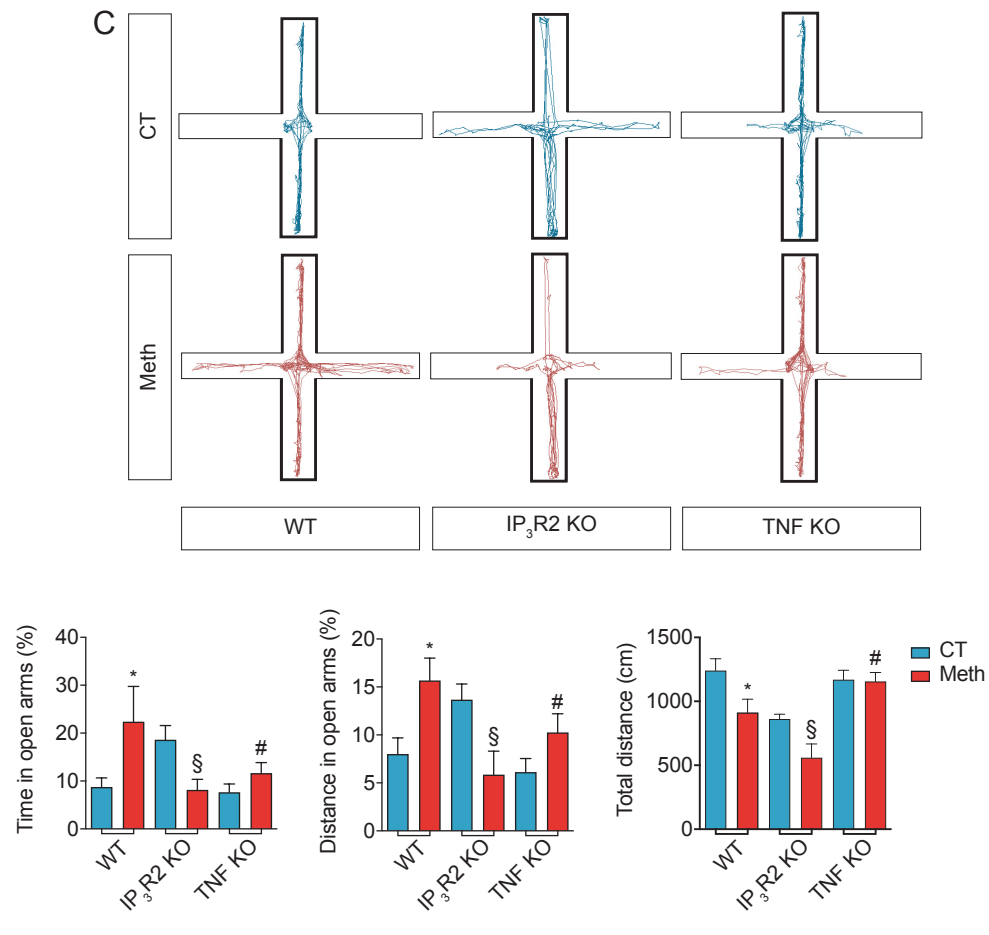



A

Meth  
exposure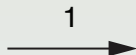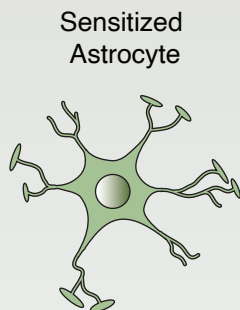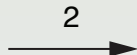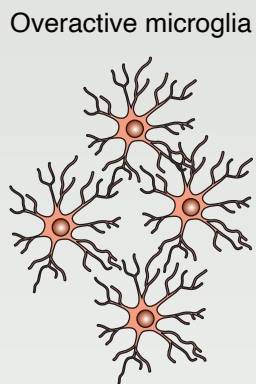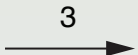

Neuroinflammation

B

Astrocyte

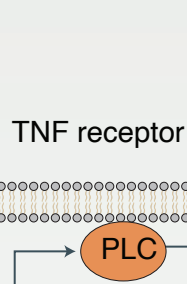

PLC

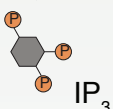IP<sub>3</sub>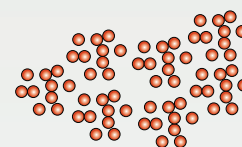Microglia  
overactivation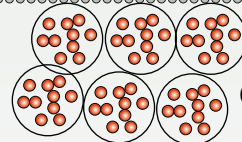Glutamate  
vesicles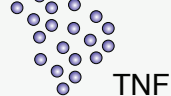

TNF

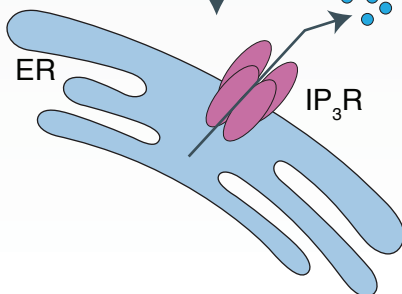

ER

IP<sub>3</sub>RCa<sup>2+</sup>Meth  
exposure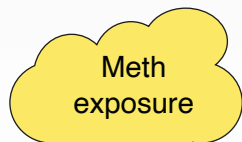

A

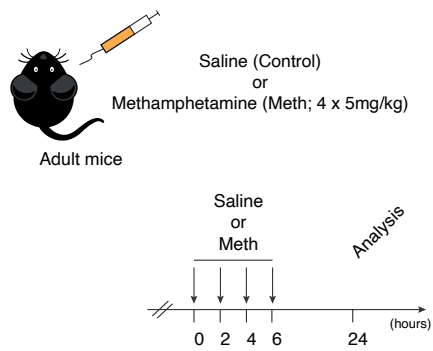

B

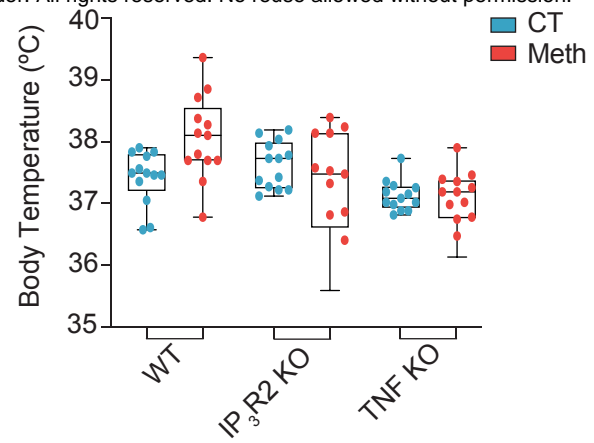

C

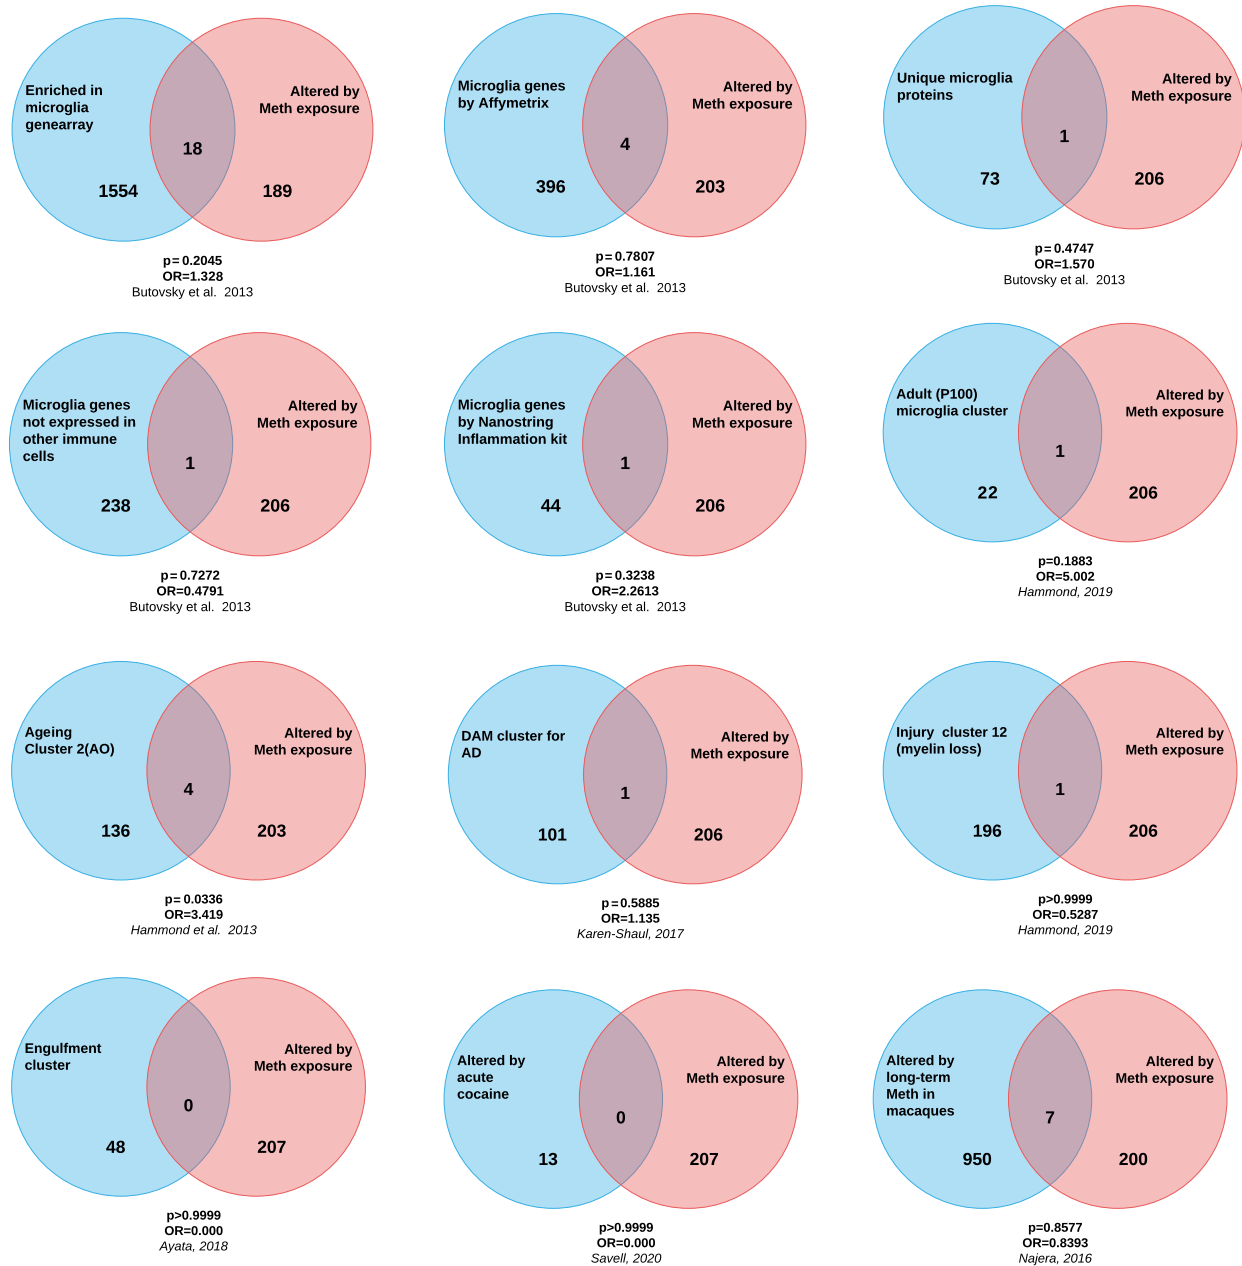

**A**

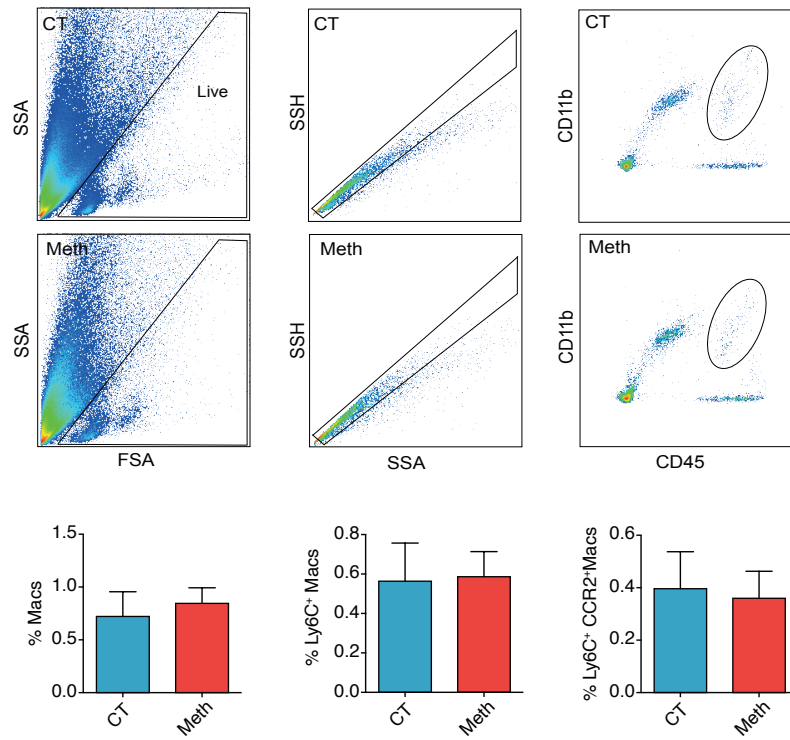

**B**

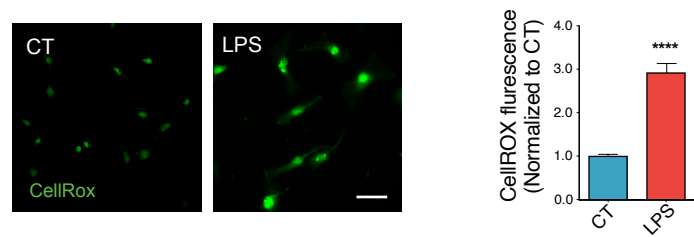

**C**

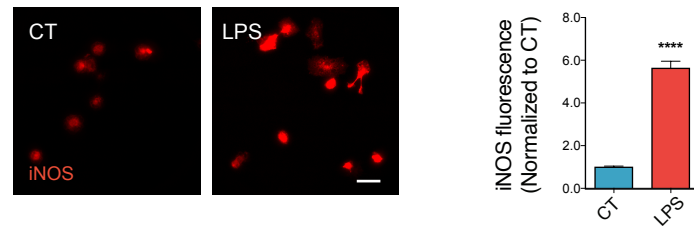

**D**

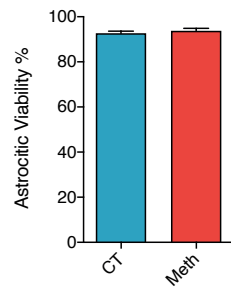

**E**

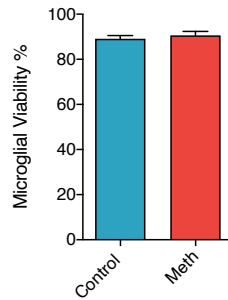

**F**

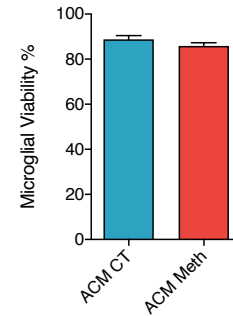



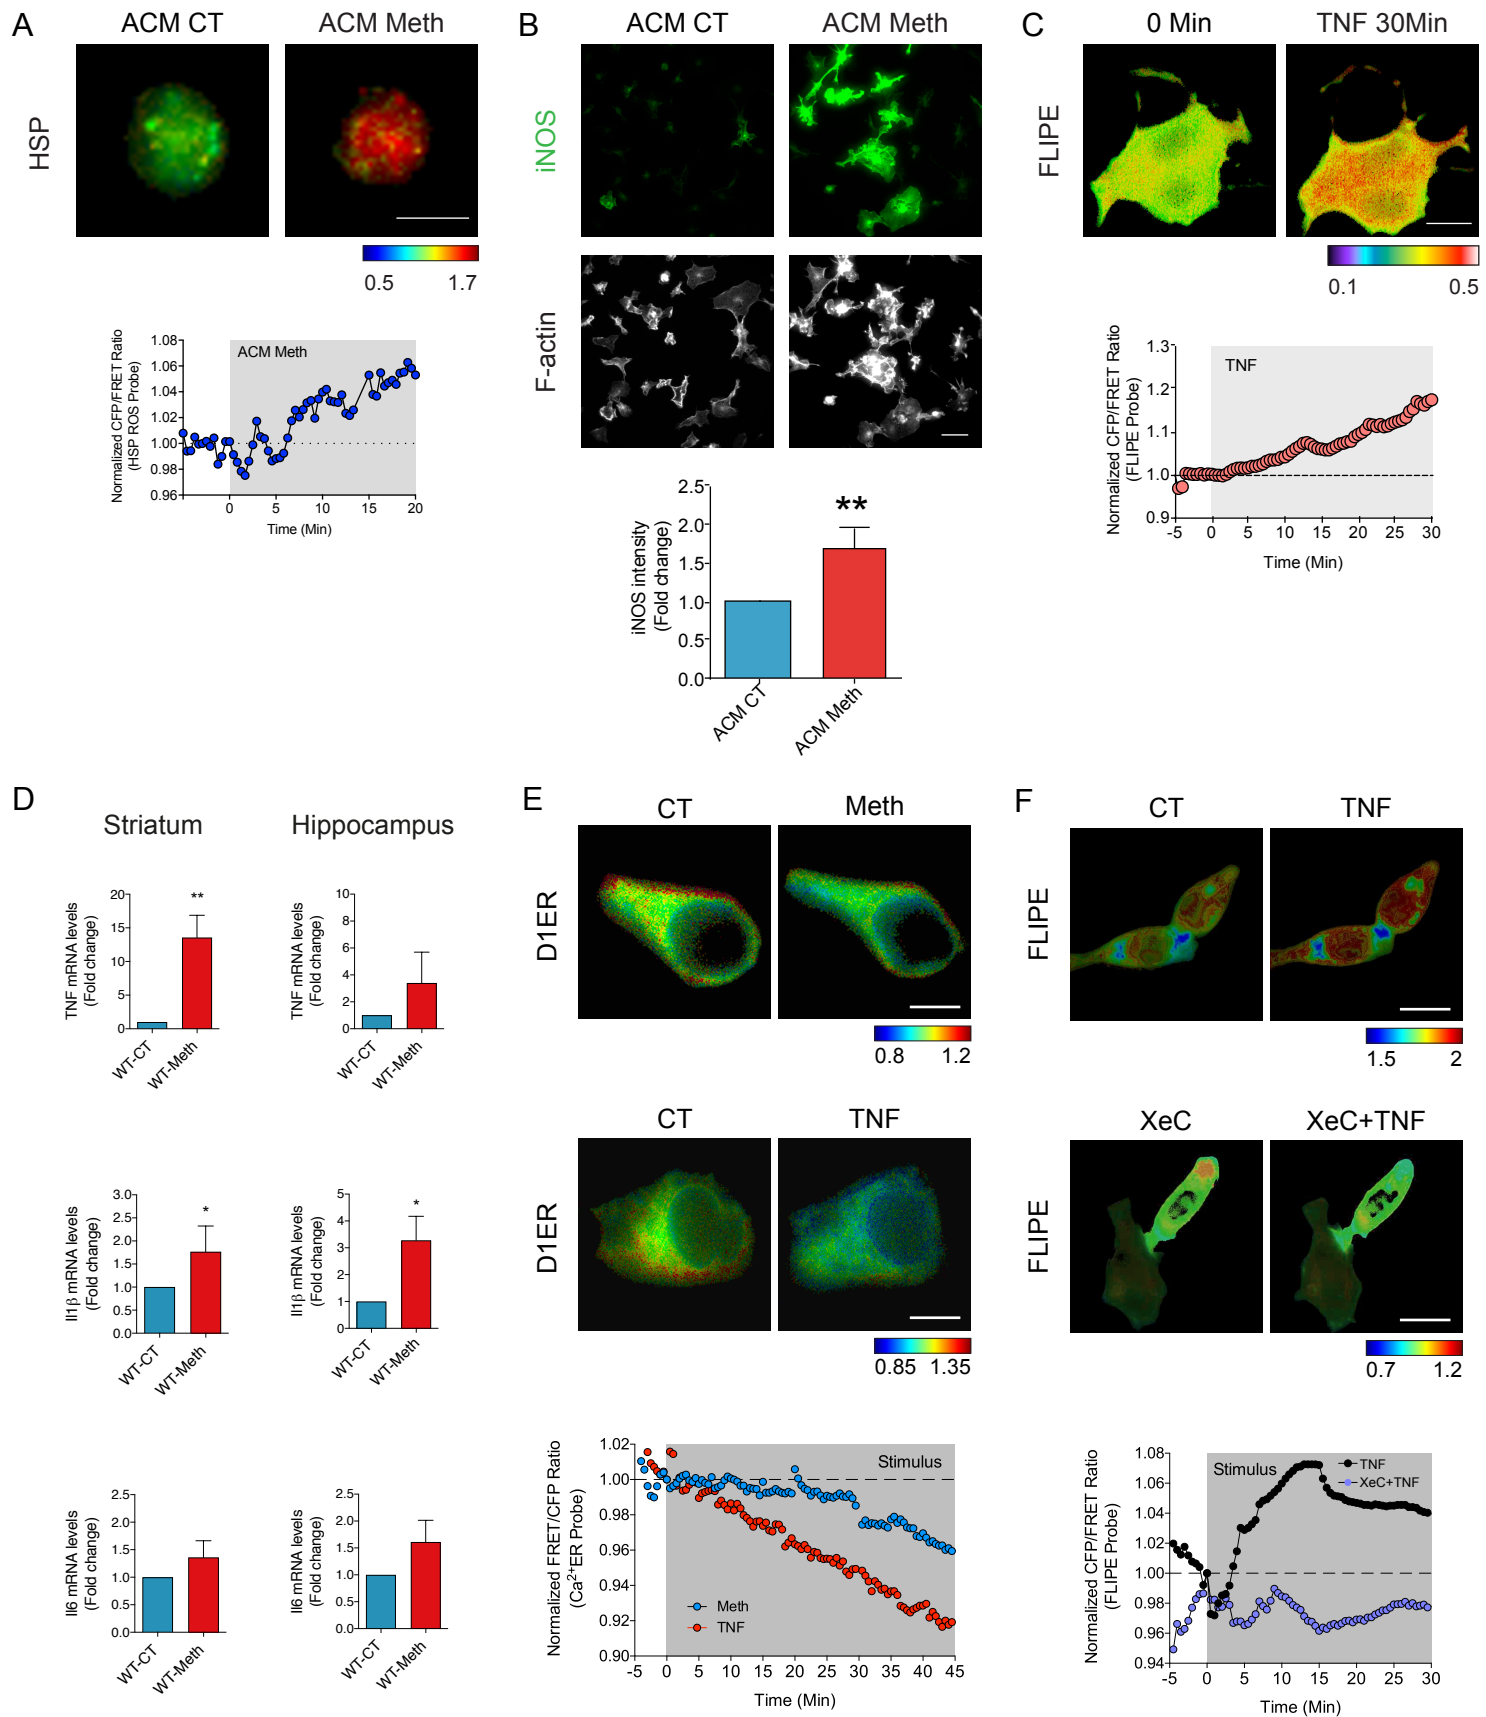

A

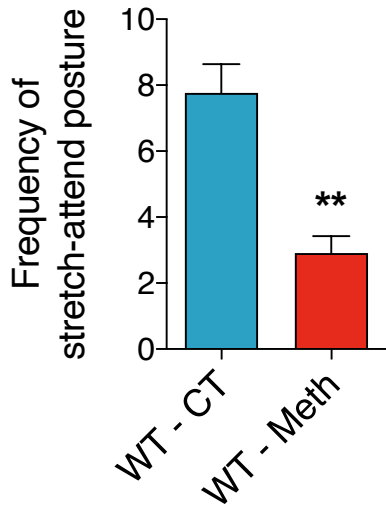

B

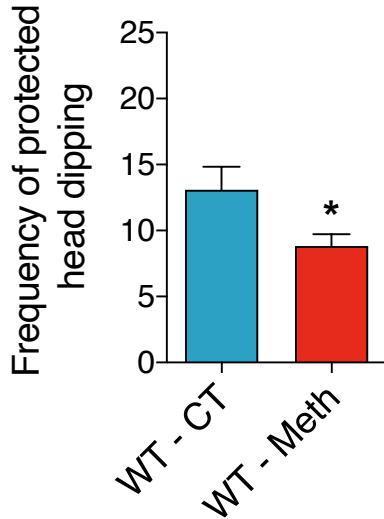

C

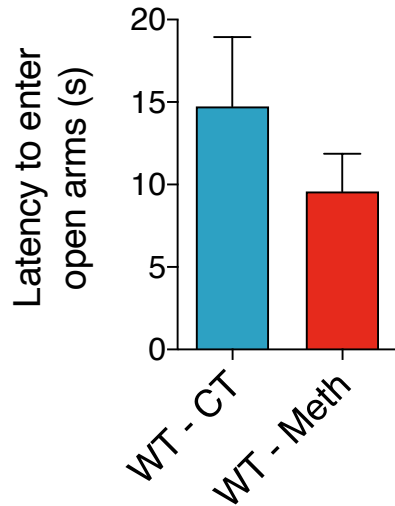

Source: https://www.biorxiv.org/content/10.1101/2021.02.22.432170v1.full.pdf
